# Supplementary material for: Mass spectrometry imaging identifies abnormally elevated brain l-DOPA levels and extrastriatal monoaminergic dysregulation in l-DOPA–induced dyskinesia
Source: PubMed Central journal article supplement — Sci Adv. 2021 Jan 6;7(2):eabe5948. doi: 10.1126/sciadv.abe5948 (PMC7787486; doi:10.1126/sciadv.abe5948), 2021-01-06
Supplement: abe5948_SM.pdf [file abe5948_SM.pdf]

## Supplementary Materials for

### **Mass spectrometry imaging identifies abnormally elevated brain L-DOPA levels and extrastriatal monoaminergic dysregulation in L-DOPA–induced dyskinesia**

Elva Fridjonsdottir, Reza Shariatgorji, Anna Nilsson, Theodosia Vallianatou, Luke R. Odell, Luke S. Schembri, Per Svenningsson, Pierre-Olivier Fernagut, Alan R. Crossman, Erwan Bezard\*, Per E. André\*

\*Corresponding author. Email: [erwan.bezard@u-bordeaux.fr](mailto:erwan.bezard@u-bordeaux.fr) (E.B.); [per.andren@farmbio.uu.se](mailto:per.andren@farmbio.uu.se) (P.E.A.)

Published 6 January 2021, *Sci. Adv.* 7, eabe5948 (2021)  
DOI: 10.1126/sciadv.abe5948

#### **The PDF file includes:**

Figs. S1 to S8  
Tables S1 to S5

#### **Other Supplementary Material for this manuscript includes the following:**

(available at [advances.sciencemag.org/cgi/content/full/7/2/eabe5948/DC1](https://advances.sciencemag.org/cgi/content/full/7/2/eabe5948/DC1))

Data files S1 to S3

# Supplementary Material

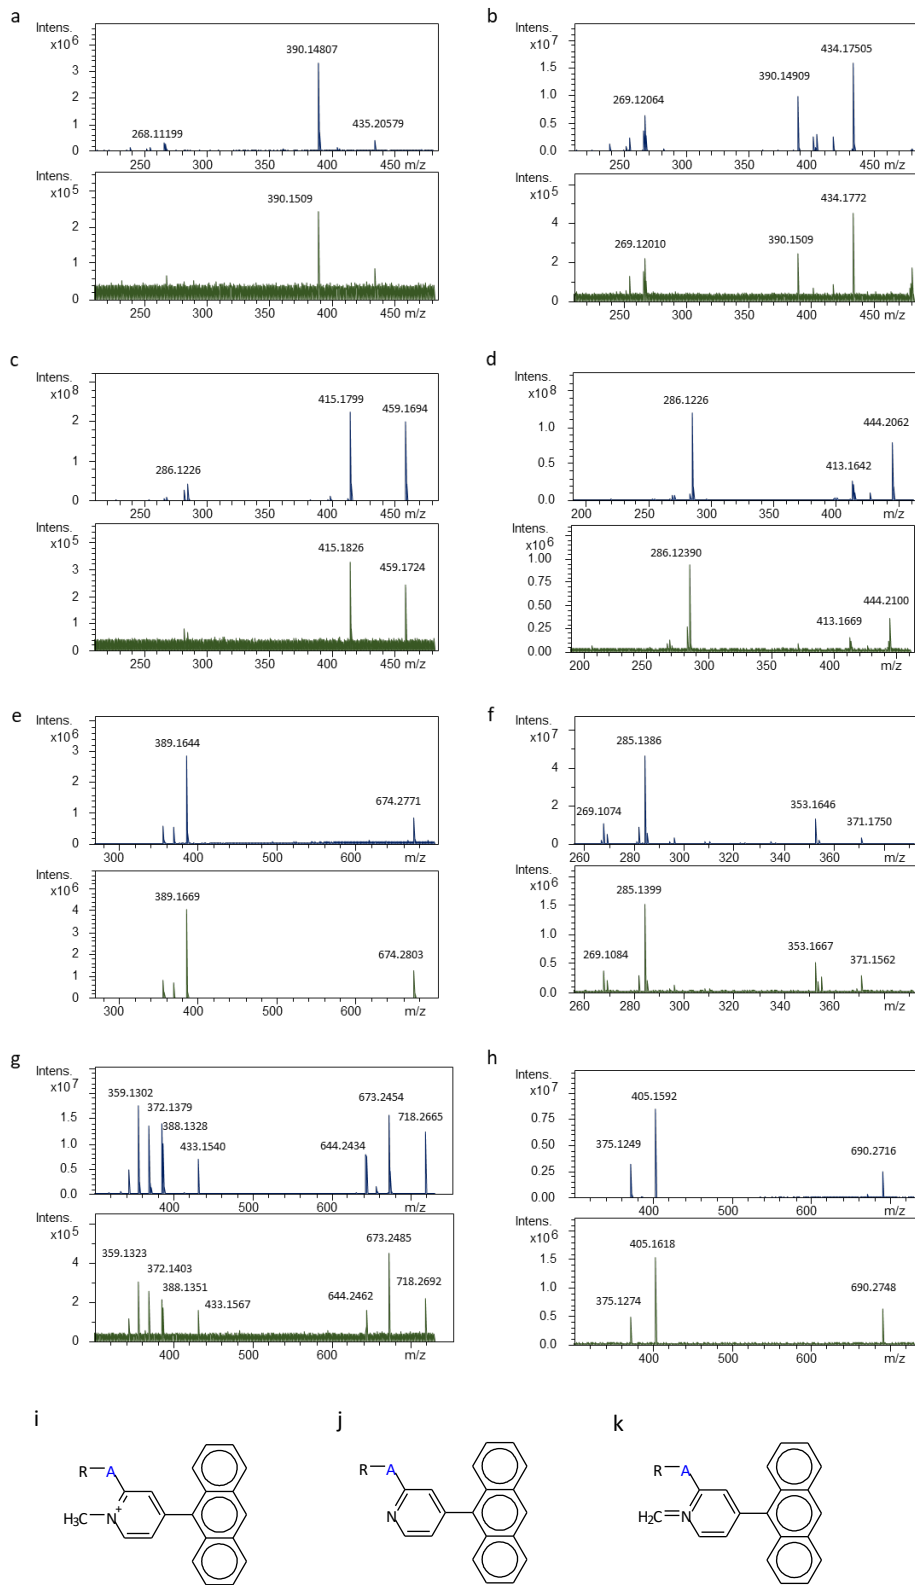

**Fig. S1. Identification of neurotransmitter metabolites and structural formulas of the different forms of the reactive matrix, FMP-10, detected in MALDI-MSI experiments.**

**(a-h)** MS/MS spectra collected from metabolite standards (blue) matched with MS/MS spectra obtained from tissue (green). **(a)** 3-MT, precursor ion  $m/z$  435.20, **(b)** 3-OMD, precursor ion  $m/z$  479.19, **(c)** 5-HIAA, precursor ion  $m/z$  459.17, **(d)** 5-HT, precursor ion  $m/z$  444.20, **(e)** DA, precursor ion  $m/z$  674.28, **(f)** GABA, precursor ion  $m/z$  371.00, **(g)** L-DOPA, precursor ion  $m/z$  718.28, **(h)** NE, precursor ion  $m/z$  690.28. The CID value was 30 eV and the precursor ion isolation window (Q1) was 1 Da for all analyses. **(i-k)** FMP-10 may be detected in three different molecular forms attached to primary amines or phenolic hydroxyl groups on target molecules. This creates a possibility of several  $m/z$  per target molecule. **(i)** Molecules that have only one reactive moiety (primary amine or phenolic hydroxyl group) are derivatized with FMP-10 (adding a positive charge,  $z = +1$ ). **(j,k)** Molecules that have more than one reactive moiety have one FMP-10 in form **(i)** and another one in form **(j)** or **(k)** ( $z = +1$ ). A, either an oxygen (O) or a nitrogen (N). R-A, the FMP-10 derivatized molecule.

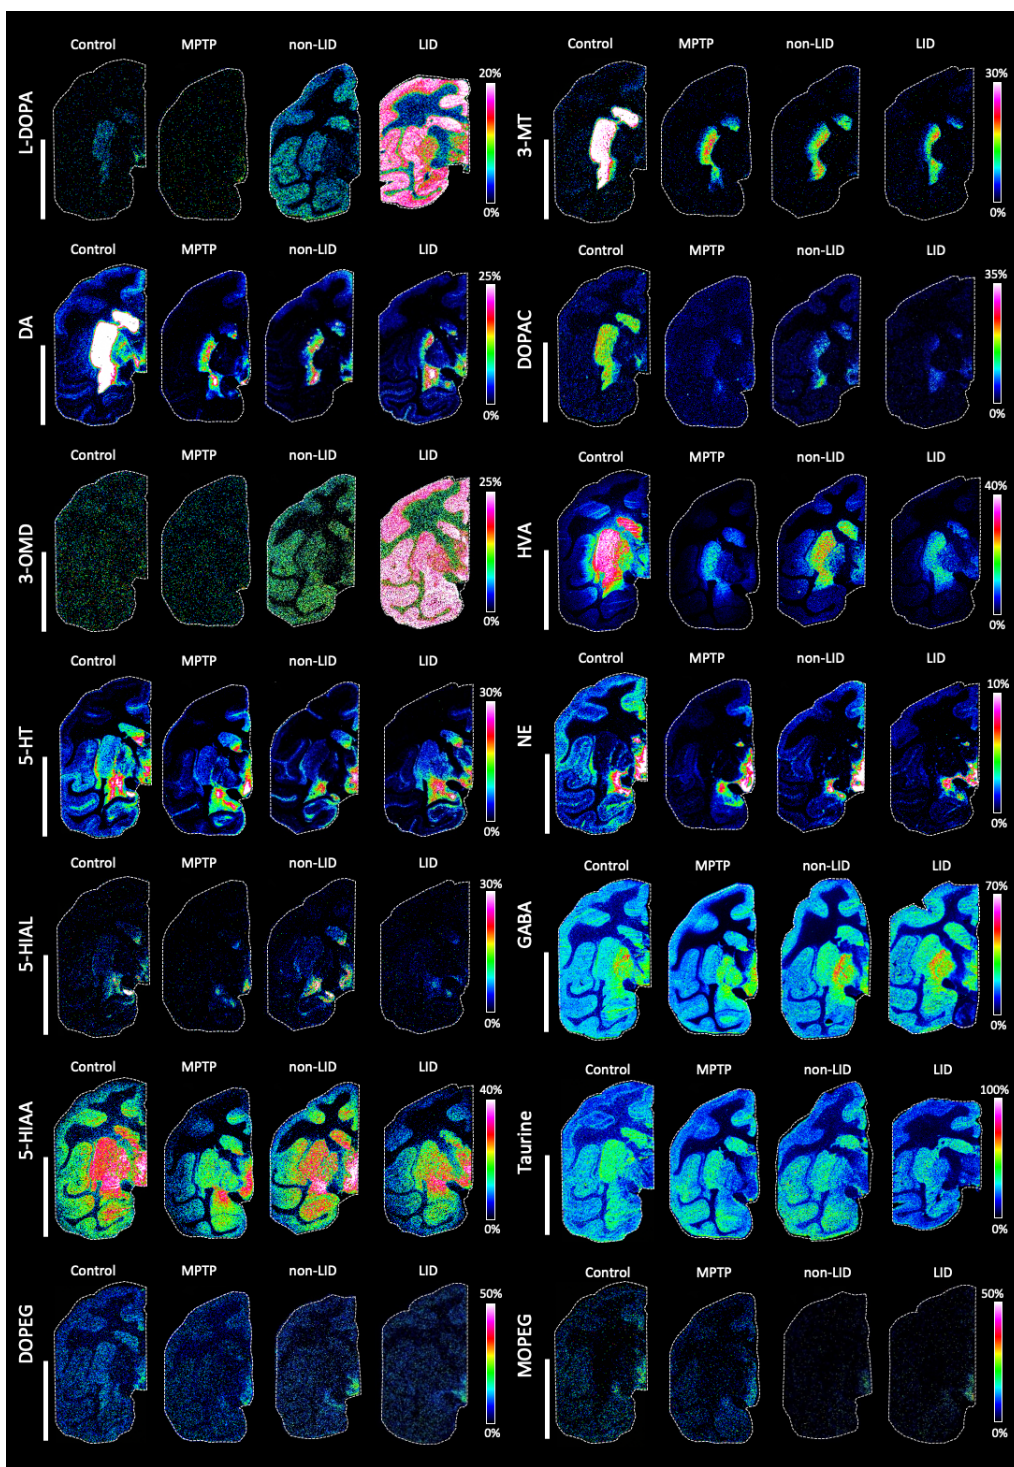

**Fig. S2. MALDI-MS images of neurotransmitters and metabolites in control, MPTP, non-LID and LID tissue sections.**

Ion intensity are indicated with a rainbow colour scale. All images are RMS normalized and log transformed. Lateral resolution 150  $\mu\text{m}$ , scale bar 20  $\mu\text{m}$ .

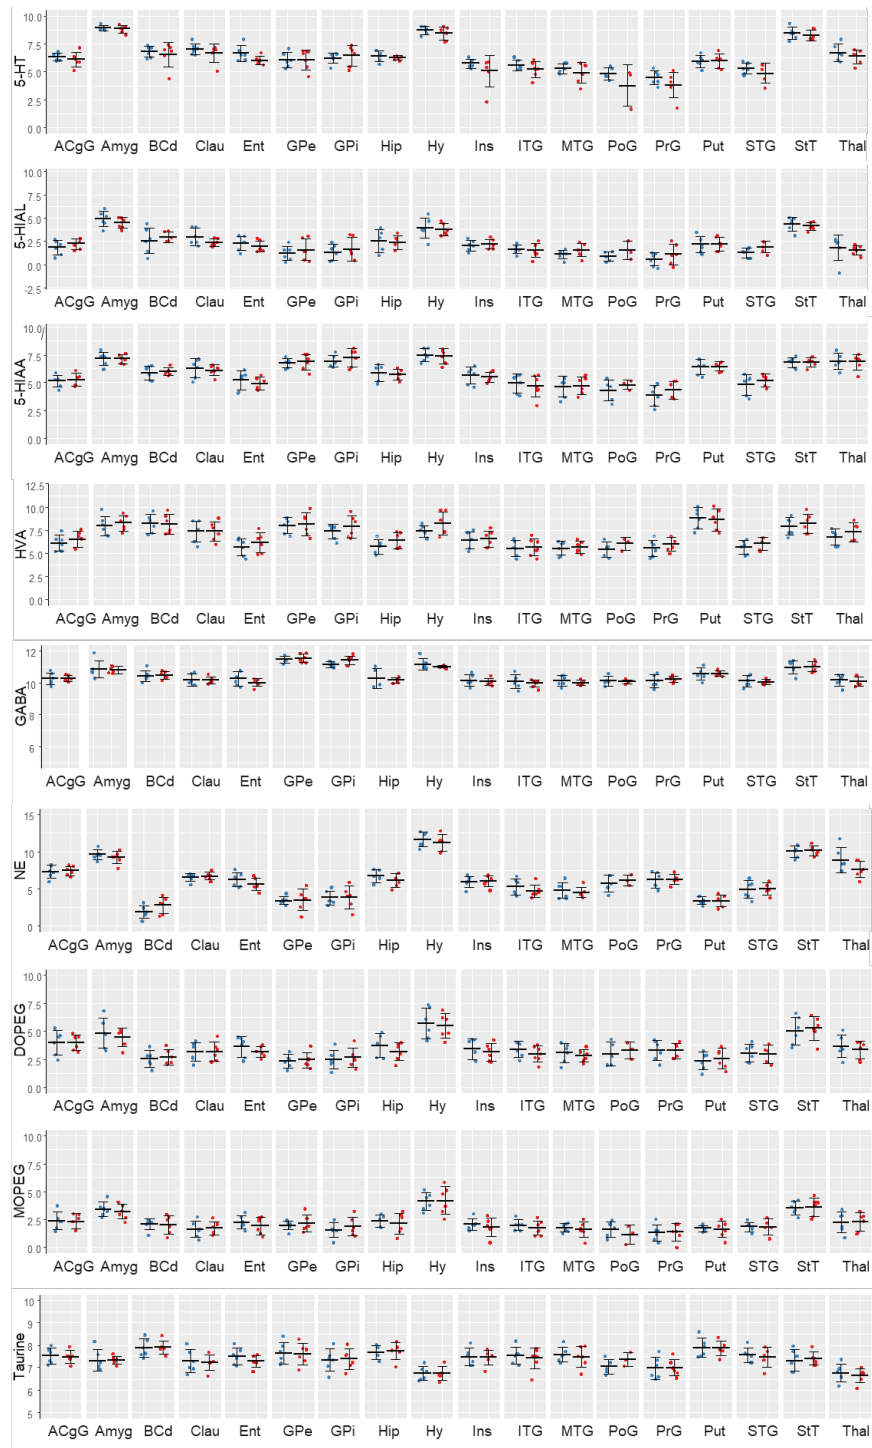

**Fig. S3. Relative quantitation of neurotransmitters and metabolites in non-LID versus LID.**

The relative levels are presented as log<sub>2</sub>AUC of each data point. Blue is non-LID, red is LID. Mean values and standard deviations are shown. A two-sample independent Mann-Whitney U test was performed, \* $P < 0.05$ .

**a**

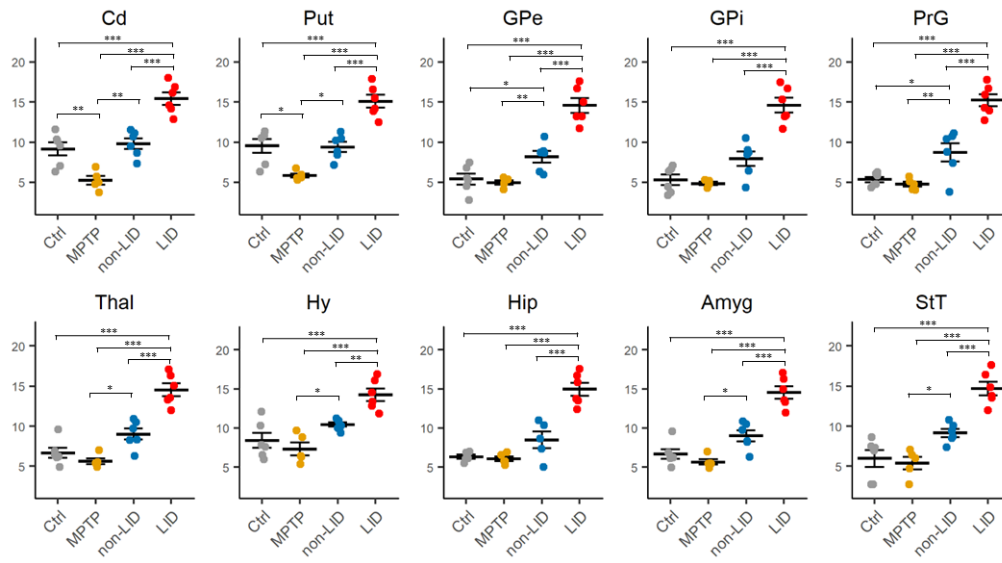

**b**

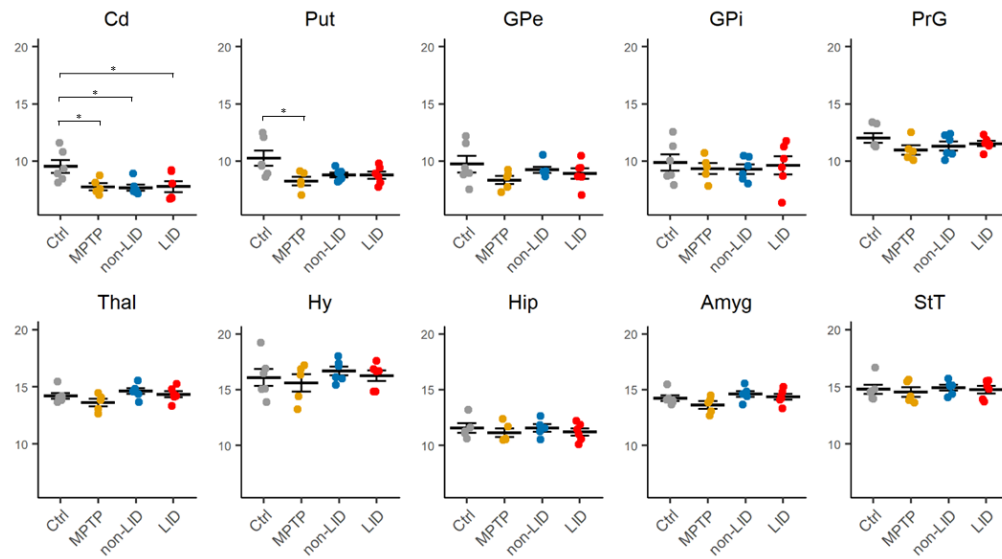

**c**

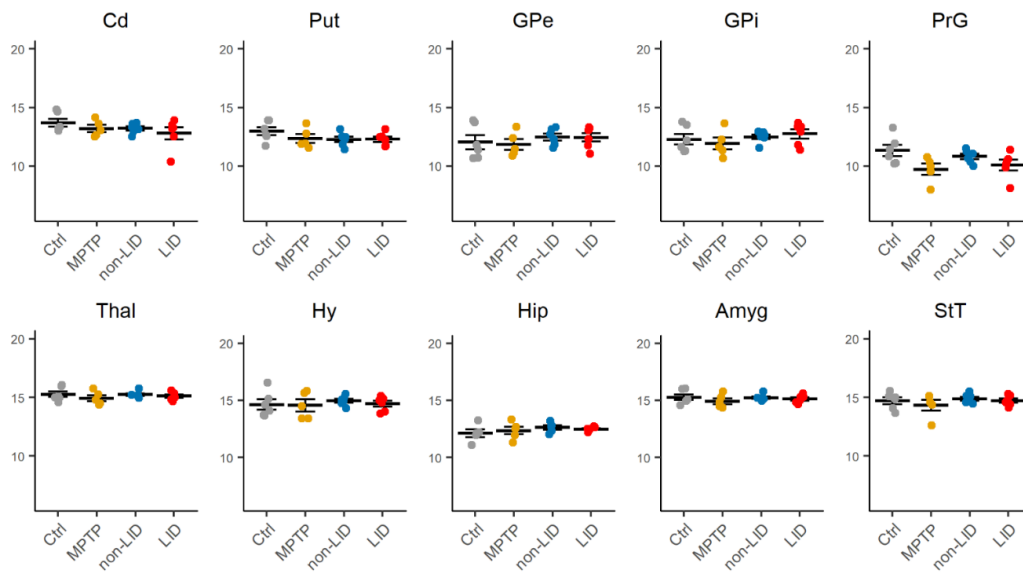

**d**

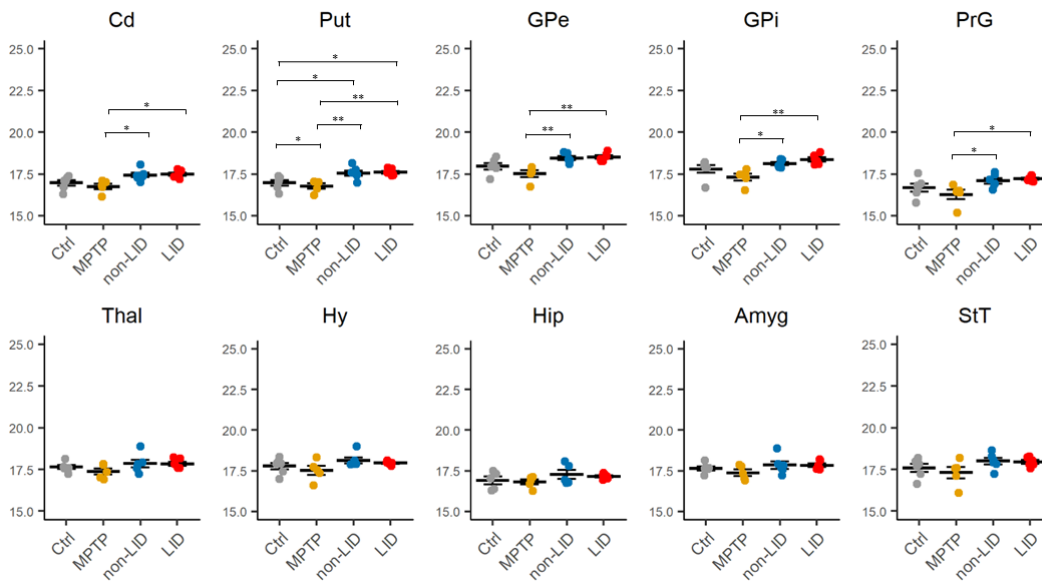

**Fig. S4. Relative comparison of L-DOPA, NE, 5-HT and GABA abundance between control, MPTP, non-LID and LID.**

The relative levels **(a)** L-DOPA, **(b)** NE, **(c)** 5-HT and **(d)** GABA are presented as  $\log_2$ AUC of each data point. Mean values and standard errors are shown. Statistics were performed using one-way ANOVA followed by a Tukey's post hoc test. Abbreviation: Ctrl, control.

\* $P < 0.05$ , \*\* $P < 0.01$  \*\*\* $P < 0.001$ .

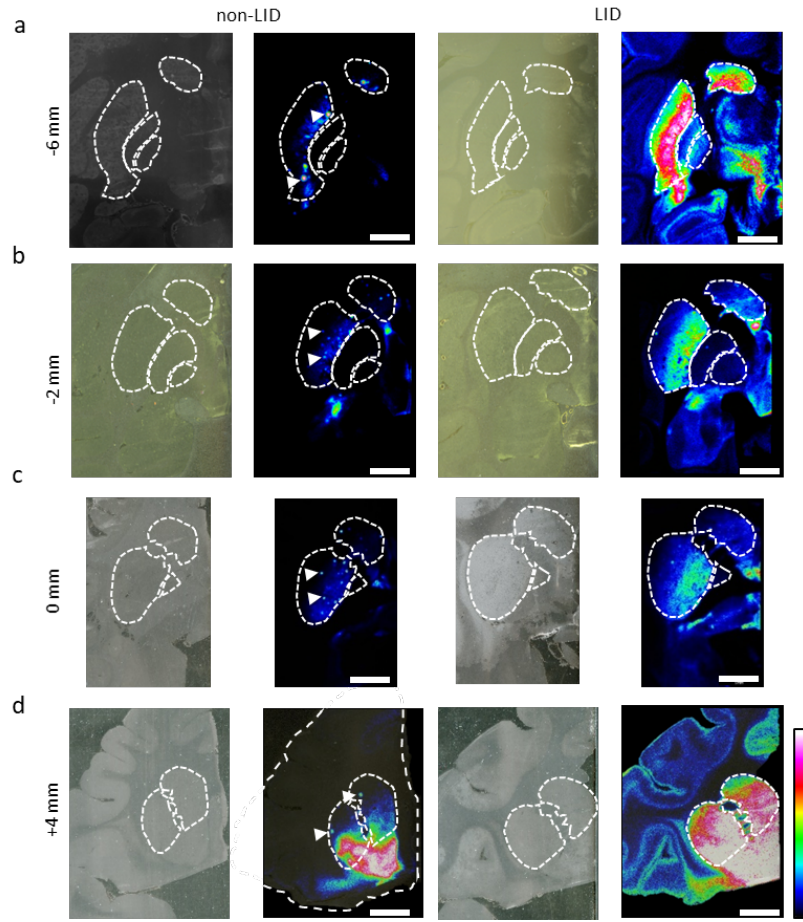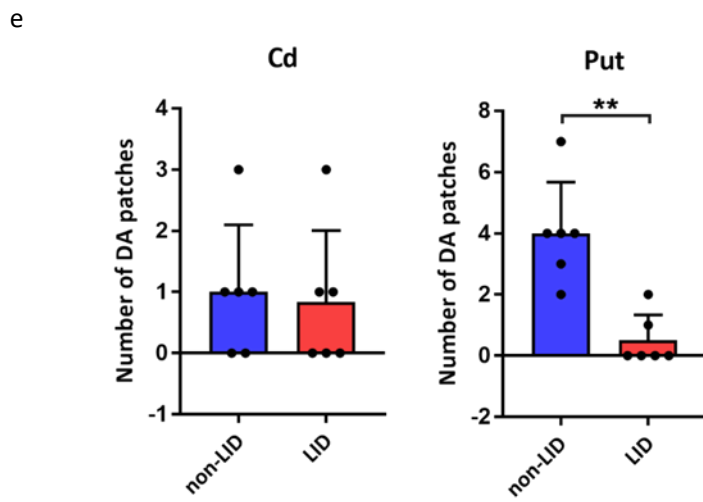



**Fig. S5. Dopamine distribution at different rostro-caudal brain levels in non-LID and LID tissue sections displaying dopamine patches in non-LID striatum and quantitation of dopamine patches.**

MALDI MS images of DA at **(a)** -6 mm ac (colour intensity scale 0-50%, lateral resolution 100  $\mu\text{m}$ ), **(b)** -2 mm ac (colour intensity scale 0-100%, lateral resolution 70  $\mu\text{m}$ ) **(c)** 0 mm ac (colour intensity scale 0-100%, lateral resolution 80  $\mu\text{m}$ ) and **(d)** +4 mm ac (colour intensity scale 0-50%, lateral resolution 80  $\mu\text{m}$ ). Scale bar is 5 mm. Images are log transformed and RMS normalised. Dopamine patches are pointed out by the arrows. **(e)** Number of dopamine patches observed in striatal structures in non-LID and LID animals at -4 mm ac (average number of DA patches and standard deviation). A Mann-Whitney U test was performed.  $**P < 0.01$ .

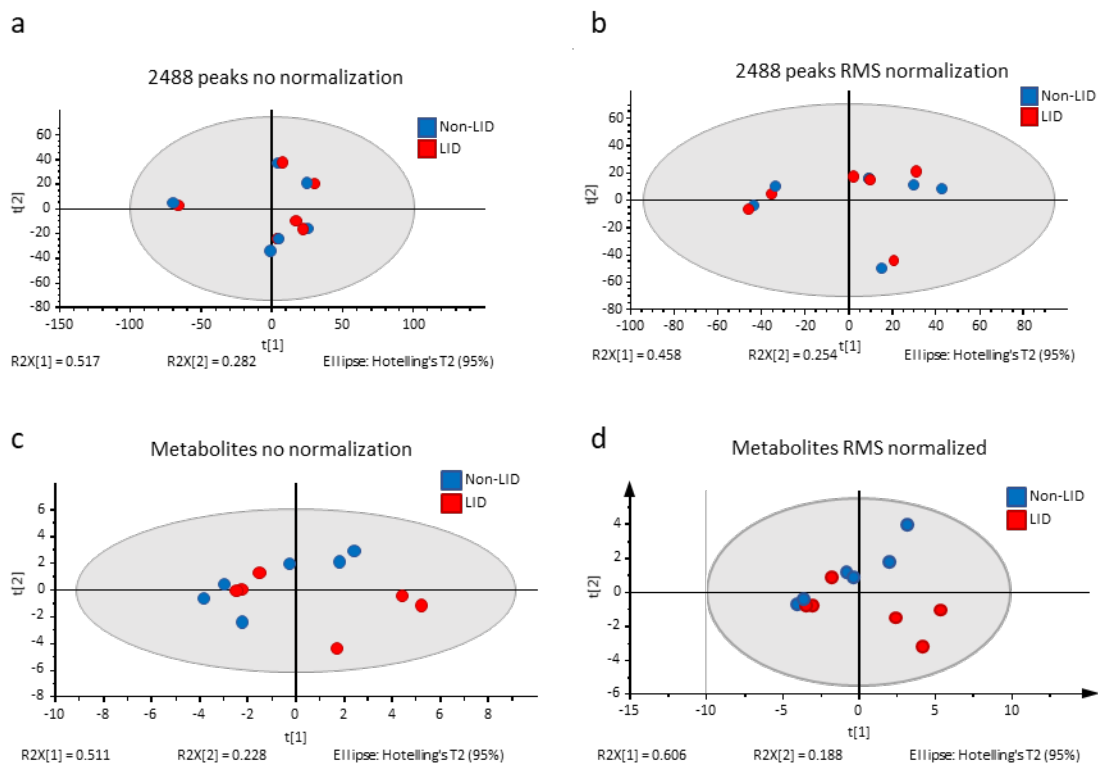

**Fig. S6. PCA analysis using untargeted and targeted  $m/z$  values as input variables.**

PCA results were computed using (a) non-normalised and (b) RMS normalised spectra from the 2488 most abundant ions in the average spectra from all experiments. The PCA showed pairing of samples prepared at the same time and acquired in the same experiment. RMS normalisation did not compensate for this pairing. PCA results were computed from the 14 identified metabolites as input variables using (c) non-normalised and (d) RMS normalised spectra. PCA from the identified metabolites did not result in pairing of samples and illustrated that although the overall intensity and major matrix clusters were affected by sample preparation and variation between experiments, the analysed metabolites were not affected to the same extent since they did not result in pairing of samples.

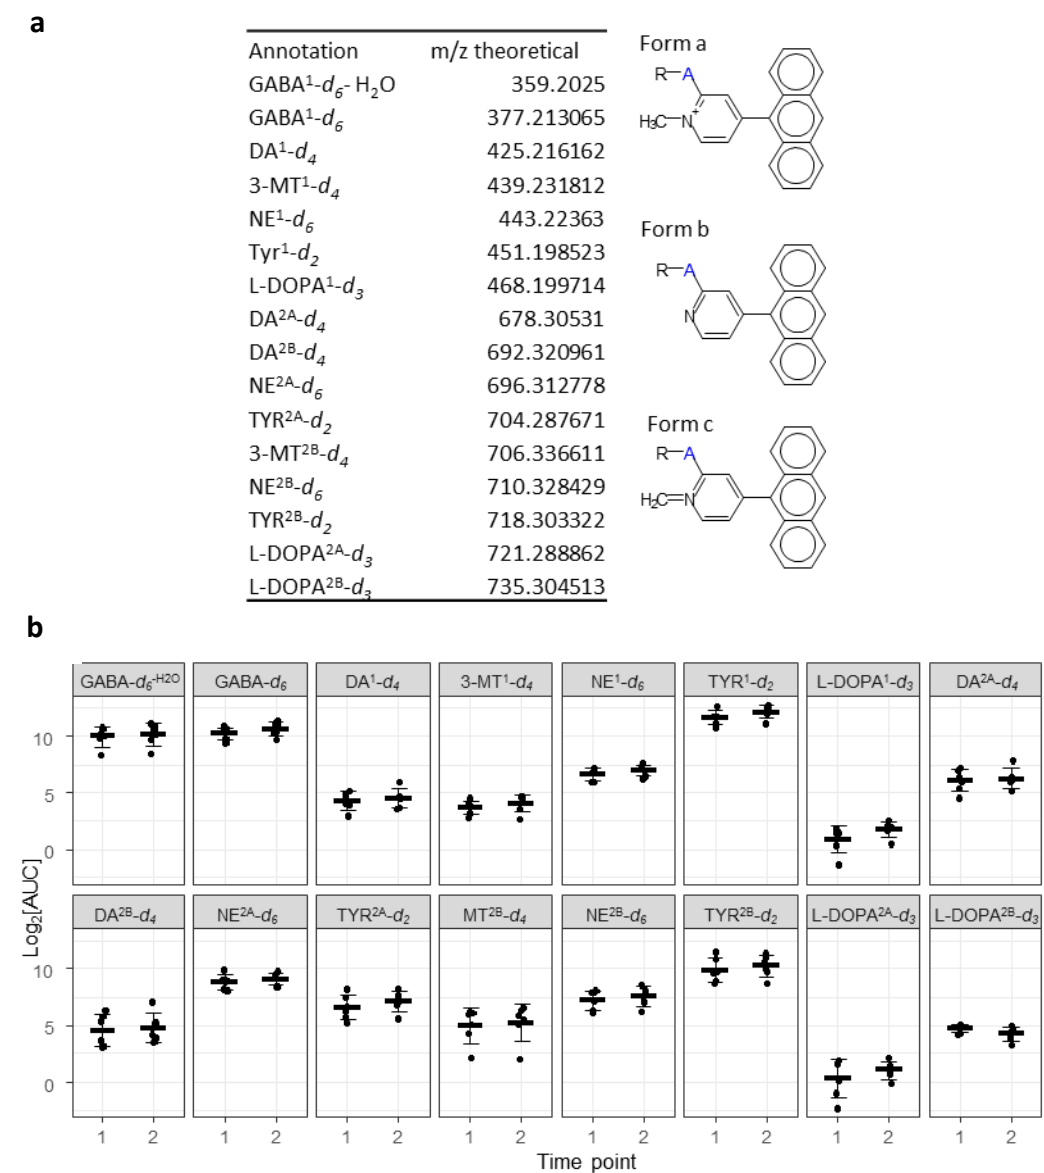

**Fig. S7. Evaluation of ion intensity changes over time using quality control standards.**

(a) *m/z* values used from quality control standards to evaluate intensity changes. All single derivatized standards have one FMP-10 molecule (form a<sup>1</sup>), the doubly derivatized molecules have one FMP-10 (form a) and a second FMP-10 molecule (either in form b<sup>2A</sup> or c<sup>2B</sup>). (b) Experimental intensity changes of quality control standards. The AUC values are collected before (time point 1) and after (time point 2) pairwise acquisition of macaque samples with an average of 30 hours between the two time-points. Mean values and standard deviations are shown. Significant changes were tested using a two sample Mann-Whitney U test showing that there were no significant changes between the two time points in any of the standards analysed,  $\alpha=0.05$ .

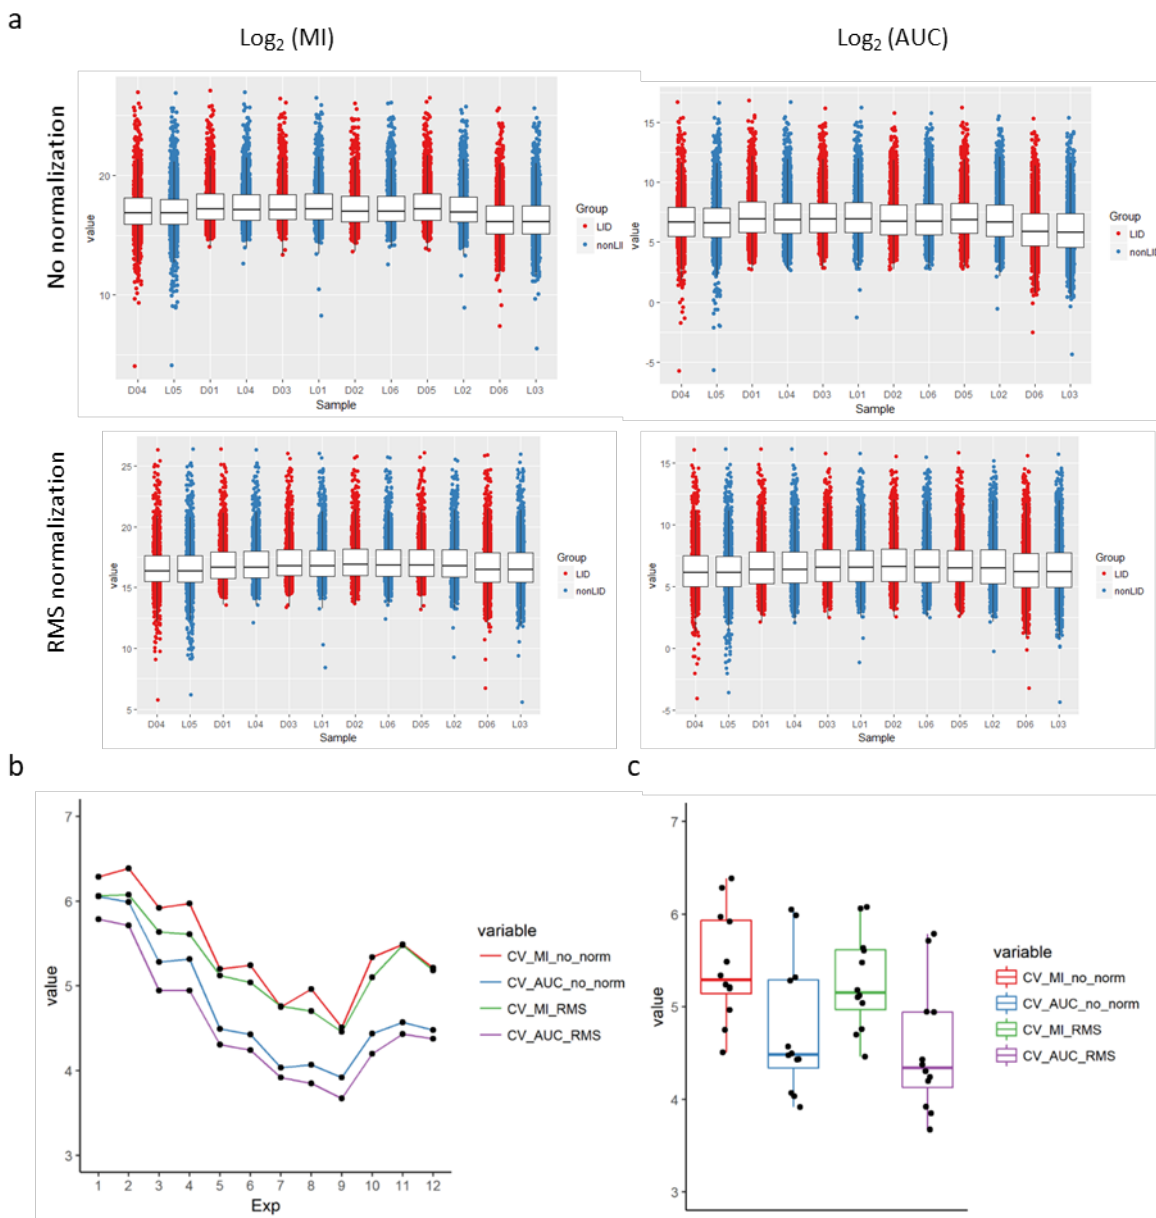

**Fig. S8. Variability between the different experiments acquired from non-LID and LID samples.**

**(a)** The variability between samples and ion intensity changes between experiments were investigated by plotting  $\log_2$  of area under curve ( $\log_2$ AUC) and  $\log_2$  of the maximum ion intensity ( $\log_2$ MI) for the 2488 most abundant peaks for each sample (tissue section). Samples are presented in chronological order of experiments (from left to right), red LID, blue non-LID. **(b)** Coefficient of variation (CV) throughout all experiments using MI or AUC and no normalization or RMS normalisation. **(c)** The most appropriate parameters for export of intensity values were determined by comparing CV between MI and AUC, with and without normalisation. RMS normalised AUC values had the lowest CV and were therefore used in the statistical analysis.

**Table S1. Experimental and theoretical  $m/z$  values and mass error for analysed metabolites.**

| Metabolite                                 | Experimental [m/z] | Theoretical [m/z] | Mass error [ppm] | Maximum intensity - RMS |
|--------------------------------------------|--------------------|-------------------|------------------|-------------------------|
| GABA <sup>1</sup> -H <sub>2</sub> O        | 353.1652           | 353.16484         | 1.0194           | 2.15E+06                |
| GABA <sup>1</sup>                          | 371.1758           | 371.175405        | 1.0642           | 490836                  |
| Taurine <sup>1</sup>                       | 393.1271           | 393.12674         | 0.9157           | 345309                  |
| DA <sup>1</sup>                            | 421.1913           | 421.191055        | 0.5817           | 12980.5                 |
| 3-MT <sup>1</sup>                          | 435.2070           | 435.206705        | 0.6778           | 19275.9                 |
| DOPAC <sup>1</sup>                         | 436.1544           | 436.154335        | 0.1490           | 19685.7                 |
| NE <sup>1</sup>                            | 437.1862           | 437.185969        | 0.5284           | 4812.03                 |
| 5-HIAL <sup>1</sup>                        | 443.1754           | 443.175405        | -0.0113          | 5186.97                 |
| 5-HT <sup>1</sup>                          | 444.2073           | 444.207039        | 0.5876           | 82117.1                 |
| HVA <sup>1</sup>                           | 450.1702           | 450.169985        | 0.4776           | 178787                  |
| MOPEG                                      | 452.1854           | 452.185635        | -0.5197          | 2295.54                 |
| 5-HIAA <sup>1</sup>                        | 459.1706           | 459.170319        | 0.6120           | 64435.5                 |
| L-DOPA <sup>1</sup>                        | 465.1811           | 465.180884        | 0.4643           | 24007.9                 |
| 3-OMD <sup>1</sup>                         | 479.1968           | 479.196534        | 0.5551           | 237163                  |
| DA <sup>2A</sup>                           | 674.2798           | 674.280203        | -0.5977          | 241909                  |
| 3-MT <sup>2A</sup> / DA <sup>2B</sup>      | 688.2955           | 688.295854        | -0.5143          | 8458.67                 |
| DOPAC <sup>2A</sup>                        | 689.2431           | 689.243483        | -0.5557          | 30071.5                 |
| NE <sup>2A</sup>                           | 690.2747           | 690.275117        | -0.6041          | 115229                  |
| DOPEG <sup>2A</sup>                        | 691.2586           | 691.259133        | -0.7711          | 5948.52                 |
| 5-HT <sup>2A</sup>                         | 697.2963           | 697.296187        | 0.1621           | 1604.53                 |
| 3-MT <sup>2B</sup>                         | 702.3113           | 702.311504        | -0.2905          | 13903.4                 |
| DOPAC <sup>2B</sup>                        | 703.2585           | 703.259133        | -0.9001          | 15355.6                 |
| NE <sup>2B</sup>                           | 704.2906           | 704.290767        | -0.2371          | 13360.8                 |
| 5-HT <sup>2B</sup>                         | 711.3118           | 711.311838        | -0.0534          | 27754.3                 |
| L-DOPA <sup>2A</sup>                       | 718.2697           | 718.270032        | -0.4622          | 651388                  |
| 3-OMD <sup>2A</sup> / L-DOPA <sup>2B</sup> | 732.2855           | 732.285682        | -0.2485          | 29951.3                 |

Structural formulas of the different forms of the reactive matrix (FMP-10) derivatization is shown in superscript (see Fig. S1); <sup>1</sup> molecule + 1 FMP-10 with form i, <sup>2A</sup> molecule + 1 FMP-10 form i + 1 FMP-10 form j, <sup>2B</sup> molecule + 1 FMP-10 form i + 1 FMP-10 form k. Maximum intensity values are collected from average spectra of all the experiments combined. For each metabolite that produces multiple different FMP-10 derivatives, the derivative that produced the highest intensity, was used i.e. GABA<sup>1</sup>-H<sub>2</sub>O, 3-MT<sup>1</sup>, DA<sup>2A</sup>, 5-HT<sup>1</sup> DOPAC<sup>2A</sup>, NE<sup>2A</sup>, DOPEG<sup>2A</sup>, L-DOPA<sup>2A</sup>, 3-OMD<sup>1</sup>. Overlapping peaks were not used. Values are RMS normalised.

**Table S2. Summarised results from hypothesis tests comparing metabolite abundances between non-LID and LID.**

| <b>Region: ACgG</b> |              | <b>Descriptive statistics</b> |             |                 | <b>Normality test</b>       | <b>Hypothesis test between non-LID and LID</b> |                  |           |                |
|---------------------|--------------|-------------------------------|-------------|-----------------|-----------------------------|------------------------------------------------|------------------|-----------|----------------|
|                     | <b>Group</b> | <b>N</b>                      | <b>Mean</b> | <b>Std. dev</b> | <b>Shapiro-Wilk p-value</b> | <b>Hypothesis test</b>                         | <b>t/U-value</b> | <b>df</b> | <b>p-value</b> |
| <b>GABA</b>         | non-LID      | 6                             | 10.43       | 0.35            | 0.923                       |                                                |                  |           |                |
|                     | LID          | 6                             | 10.48       | 0.23            | 0.208                       | t-test                                         | 0.034            | 10        | 0.973          |
| <b>Taurine</b>      | non-LID      | 6                             | 7.87        | 0.40            | 0.537                       |                                                |                  |           |                |
|                     | LID          | 6                             | 7.90        | 0.30            | 0.483                       | t-test                                         | 0.183            | 10        | 0.858          |
| <b>3-MT</b>         | non-LID      | 6                             | 4.52        | 1.68            | 0.494                       |                                                |                  |           |                |
|                     | LID          | 6                             | 5.25        | 1.58            | 0.219                       | t-test                                         | 3.040            | 10        | 0.012          |
| <b>5-HIAL</b>       | non-LID      | 6                             | 2.59        | 1.39            | 0.559                       |                                                |                  |           |                |
|                     | LID          | 6                             | 2.93        | 0.54            | 0.477                       | t-test                                         | 0.979            | 10        | 0.351          |
| <b>5-HT</b>         | non-LID      | 6                             | 6.80        | 0.50            | 0.270                       |                                                |                  |           |                |
|                     | LID          | 6                             | 6.56        | 1.11            | 0.857                       | t-test                                         | 0.838            | 10        | 0.422          |
| <b>HVA</b>          | non-LID      | 6                             | 8.23        | 1.00            | 0.611                       |                                                |                  |           |                |
|                     | LID          | 6                             | 8.18        | 1.06            | 0.454                       | t-test                                         | 0.811            | 9.984     | 0.436          |
| <b>MOPEG</b>        | non-LID      | 6                             | 2.09        | 0.49            | 0.622                       |                                                |                  |           |                |
|                     | LID          | 6                             | 2.06        | 0.81            | 0.209                       | t-test                                         | 0.125            | 9.725     | 0.903          |
| <b>5-HIAA</b>       | non-LID      | 6                             | 5.89        | 0.61            | 0.603                       |                                                |                  |           |                |
|                     | LID          | 6                             | 5.98        | 0.33            | 0.291                       | t-test                                         | 0.285            | 10        | 0.782          |
| <b>3-OMD</b>        | non-LID      | 6                             | 4.62        | 0.50            | 0.561                       |                                                |                  |           |                |
|                     | LID          | 6                             | 8.38        | 1.22            | 0.239                       | t-test                                         | 7.112            | 10        | < 0.001        |
| <b>DA</b>           | non-LID      | 6                             | 7.12        | 1.98            | 0.852                       |                                                |                  |           |                |
|                     | LID          | 6                             | 9.06        | 2.01            | 0.212                       | t-test                                         | 3.350            | 10        | 0.007          |
| <b>DOPAC</b>        | non-LID      | 6                             | 5.49        | 1.15            | 0.054                       |                                                |                  |           |                |
|                     | LID          | 6                             | 6.45        | 1.44            | 0.549                       | t-test                                         | 1.546            | 10        | 0.153          |
| <b>NE</b>           | non-LID      | 6                             | 1.94        | 0.84            | 0.806                       |                                                |                  |           |                |
|                     | LID          | 6                             | 2.79        | 1.14            | 0.740                       | t-test                                         | 0.296            | 10        | 0.773          |
| <b>DOPEG</b>        | non-LID      | 6                             | 2.53        | 0.73            | 0.704                       |                                                |                  |           |                |
|                     | LID          | 6                             | 2.69        | 0.68            | 0.420                       | t-test                                         | 0.066            | 10        | 0.948          |
| <b>L-DOPA</b>       | non-LID      | 6                             | 4.72        | 1.70            | 0.239                       |                                                |                  |           |                |
|                     | LID          | 6                             | 10.50       | 1.92            | 0.873                       | t-test                                         | 5.278            | 10        | < 0.001        |

| <b>Region: Amyg</b> |          | <b>Descriptive statistics</b> |                 |                     | <b>Normality test</b> | <b>Hypothesis test between non-LID and LID</b> |                  |           |                |
|---------------------|----------|-------------------------------|-----------------|---------------------|-----------------------|------------------------------------------------|------------------|-----------|----------------|
| <b>Group</b>        | <b>N</b> | <b>Mean</b>                   | <b>Std. dev</b> | <b>Shapiro-Wilk</b> | <b>p-value</b>        | <b>Hypothesis test</b>                         | <b>t/U-value</b> | <b>df</b> | <b>p-value</b> |
| <b>GABA</b>         | non-LID  | 6                             | 10.85           | 0.55                | 0.086                 |                                                |                  |           |                |
|                     | LID      | 6                             | 10.81           | 0.22                | 0.285                 | t-test                                         | 0.148            | 10        | 0.885          |
| <b>Taurine</b>      | non-LID  | 6                             | 7.32            | 0.48                | 0.181                 |                                                |                  |           |                |
|                     | LID      | 6                             | 7.34            | 0.18                | 0.979                 | t-test                                         | 0.564            | 10        | 0.585          |
| <b>3-MT</b>         | non-LID  | 6                             | 4.89            | 1.17                | 0.752                 |                                                |                  |           |                |
|                     | LID      | 6                             | 5.26            | 1.09                | 0.054                 | t-test                                         | 0.109            | 10        | 0.916          |
| <b>5-HIAL</b>       | non-LID  | 6                             | 4.88            | 0.83                | 0.947                 |                                                |                  |           |                |
|                     | LID      | 6                             | 4.47            | 0.58                | 0.347                 | t-test                                         | 0.993            | 10        | 0.344          |
| <b>5-HT</b>         | non-LID  | 6                             | 8.91            | 0.23                | 0.037                 |                                                |                  |           |                |
|                     | LID      | 6                             | 8.82            | 0.33                | 0.940                 | Mann-Whitney U                                 | 16.000           | NA        | 0.820          |
| <b>HVA</b>          | non-LID  | 6                             | 7.99            | 1.08                | 0.527                 |                                                |                  |           |                |
|                     | LID      | 6                             | 8.28            | 0.84                | 0.841                 | t-test                                         | 0.524            | 10        | 0.612          |
| <b>MOPEG</b>        | non-LID  | 6                             | 3.43            | 0.65                | 0.622                 |                                                |                  |           |                |
|                     | LID      | 6                             | 3.20            | 0.67                | 0.957                 | t-test                                         | 0.624            | 10        | 0.547          |
| <b>5-HIAA</b>       | non-LID  | 6                             | 7.16            | 0.59                | 0.555                 |                                                |                  |           |                |
|                     | LID      | 6                             | 7.12            | 0.40                | 0.562                 | t-test                                         | 0.115            | 10        | 0.911          |
| <b>3-OMD</b>        | non-LID  | 6                             | 4.53            | 0.45                | 0.229                 |                                                |                  |           |                |
|                     | LID      | 6                             | 8.21            | 1.23                | 0.475                 | t-test                                         | 6.881            | 10        | < 0.001        |
| <b>DA</b>           | non-LID  | 6                             | 10.22           | 0.45                | 0.493                 |                                                |                  |           |                |
|                     | LID      | 6                             | 11.29           | 0.79                | 0.663                 | t-test                                         | 2.893            | 10        | 0.016          |
| <b>DOPAC</b>        | non-LID  | 6                             | 6.51            | 1.10                | 0.899                 |                                                |                  |           |                |
|                     | LID      | 6                             | 7.41            | 1.07                | 0.697                 | t-test                                         | 1.427            | 10        | 0.184          |
| <b>NE</b>           | non-LID  | 6                             | 9.55            | 0.65                | 0.374                 |                                                |                  |           |                |
|                     | LID      | 6                             | 9.22            | 0.82                | 0.625                 | t-test                                         | 0.772            | 10        | 0.458          |
| <b>DOPEG</b>        | non-LID  | 6                             | 4.81            | 1.35                | 0.705                 |                                                |                  |           |                |
|                     | LID      | 6                             | 4.47            | 0.82                | 0.057                 | t-test                                         | 0.540            | 10        | 0.601          |
| <b>L-DOPA</b>       | non-LID  | 6                             | 3.84            | 1.88                | 0.635                 |                                                |                  |           |                |
|                     | LID      | 6                             | 9.64            | 1.93                | 0.873                 | t-test                                         | 5.270            | 10        | < 0.001        |

| <b>Region: Cd</b> |          | <b>Descriptive statistics</b> |                 |                     | <b>Normality test</b> | <b>Hypothesis test between non-LID and LID</b> |                  |           |                |
|-------------------|----------|-------------------------------|-----------------|---------------------|-----------------------|------------------------------------------------|------------------|-----------|----------------|
| <b>Group</b>      | <b>N</b> | <b>Mean</b>                   | <b>Std. dev</b> | <b>Shapiro-Wilk</b> | <b>p-value</b>        | <b>Hypothesis test</b>                         | <b>t/U-value</b> | <b>df</b> | <b>p-value</b> |
| <b>GABA</b>       | non-LID  | 6                             | 10.43           | 0.35                | 0.396                 |                                                |                  |           |                |
|                   | LID      | 6                             | 10.48           | 0.23                | 0.618                 | t-test                                         | 0.258            | 10        | 0.802          |
| <b>Taurine</b>    | non-LID  | 6                             | 7.87            | 0.40                | 0.616                 |                                                |                  |           |                |
|                   | LID      | 6                             | 7.90            | 0.30                | 0.188                 | t-test                                         | 0.165            | 10        | 0.872          |
| <b>3-MT</b>       | non-LID  | 6                             | 4.52            | 1.68                | 0.406                 |                                                |                  |           |                |
|                   | LID      | 6                             | 5.25            | 1.58                | 0.506                 | t-test                                         | 0.780            | 10        | 0.454          |
| <b>5-HIAL</b>     | non-LID  | 6                             | 2.59            | 1.39                | 0.937                 |                                                |                  |           |                |
|                   | LID      | 6                             | 2.93            | 0.54                | 0.059                 | t-test                                         | 0.561            | 10        | 0.587          |
| <b>5-HT</b>       | non-LID  | 6                             | 6.80            | 0.50                | 0.313                 |                                                |                  |           |                |
|                   | LID      | 6                             | 6.56            | 1.11                | 0.023                 | Mann-Whitney U                                 | 17.000           | NA        | 0.937          |
| <b>HVA</b>        | non-LID  | 6                             | 8.23            | 1.00                | 0.732                 |                                                |                  |           |                |
|                   | LID      | 6                             | 8.18            | 1.06                | 0.418                 | t-test                                         | 0.083            | 10        | 0.936          |
| <b>MOPEG</b>      | non-LID  | 6                             | 2.09            | 0.49                | 0.032                 |                                                |                  |           |                |
|                   | LID      | 6                             | 2.06            | 0.81                | 0.676                 | Mann-Whitney U                                 | 12.000           | NA        | 0.662          |
| <b>5-HIAA</b>     | non-LID  | 6                             | 5.89            | 0.61                | 0.236                 |                                                |                  |           |                |
|                   | LID      | 6                             | 5.98            | 0.33                | 0.523                 | t-test                                         | 0.317            | 7.739     | 0.760          |
| <b>3-OMD</b>      | non-LID  | 6                             | 4.62            | 0.50                | 0.407                 |                                                |                  |           |                |
|                   | LID      | 6                             | 8.38            | 1.22                | 0.226                 | t-test                                         | 6.994            | 6.648     | < 0.001        |
| <b>DA</b>         | non-LID  | 6                             | 7.12            | 1.98                | 0.201                 |                                                |                  |           |                |
|                   | LID      | 6                             | 9.06            | 2.01                | 0.676                 | t-test                                         | 1.680            | 10        | 0.124          |
| <b>DOPAC</b>      | non-LID  | 6                             | 5.49            | 1.15                | 0.686                 |                                                |                  |           |                |
|                   | LID      | 6                             | 6.45            | 1.44                | 0.843                 | t-test                                         | 1.278            | 10        | 0.230          |
| <b>NE</b>         | non-LID  | 6                             | 1.94            | 0.84                | 0.979                 |                                                |                  |           |                |
|                   | LID      | 6                             | 2.79            | 1.14                | 0.385                 | t-test                                         | 1.480            | 10        | 0.170          |
| <b>DOPEG</b>      | non-LID  | 6                             | 2.53            | 0.73                | 0.925                 |                                                |                  |           |                |
|                   | LID      | 6                             | 2.69            | 0.68                | 0.281                 | t-test                                         | 0.380            | 10        | 0.712          |
| <b>L-DOPA</b>     | non-LID  | 6                             | 4.72            | 1.70                | 0.542                 |                                                |                  |           |                |
|                   | LID      | 6                             | 10.50           | 1.92                | 0.938                 | t-test                                         | 5.520            | 10        | < 0.001        |



| Region: Clau   |         | Descriptive statistics |          |         | Normality test<br>Shapiro-Wilk | Hypothesis test between non-LID and LID |        |         |         |
|----------------|---------|------------------------|----------|---------|--------------------------------|-----------------------------------------|--------|---------|---------|
| Group          | N       | Mean                   | Std. dev | p-value | Hypothesis test                | t/U-value                               | df     | p-value |         |
| <b>GABA</b>    | non-LID | 6                      | 10.17    | 0.37    | 0.115                          |                                         |        |         |         |
|                | LID     | 6                      | 10.15    | 0.22    | 0.374                          | t-test                                  | 0.121  | 10      | 0.906   |
| <b>Taurine</b> | non-LID | 6                      | 7.29     | 0.52    | 0.728                          |                                         |        |         |         |
|                | LID     | 6                      | 7.22     | 0.33    | 0.179                          | t-test                                  | 0.278  | 10      | 0.787   |
| <b>3-MT</b>    | non-LID | 6                      | -0.26    | 1.91    | 0.725                          |                                         |        |         |         |
|                | LID     | 6                      | 2.63     | 1.64    | 0.834                          | t-test                                  | 2.814  | 10      | 0.018   |
| <b>5-HIAL</b>  | non-LID | 6                      | 2.97     | 0.91    | 0.286                          |                                         |        |         |         |
|                | LID     | 6                      | 2.37     | 0.40    | 0.245                          | t-test                                  | 1.473  | 6.914   | 0.185   |
| <b>5-HT</b>    | non-LID | 6                      | 7.04     | 0.51    | 0.628                          |                                         |        |         |         |
|                | LID     | 6                      | 6.66     | 0.80    | 0.004                          | Mann-Whitney U                          | 15.000 | NA      | 0.699   |
| <b>HVA</b>     | non-LID | 6                      | 7.39     | 1.14    | 0.356                          |                                         |        |         |         |
|                | LID     | 6                      | 7.40     | 1.04    | 0.954                          | t-test                                  | 0.021  | 10      | 0.983   |
| <b>MOPEG</b>   | non-LID | 6                      | 1.64     | 0.75    | 0.962                          |                                         |        |         |         |
|                | LID     | 6                      | 1.74     | 0.59    | 0.662                          | t-test                                  | 0.258  | 10      | 0.802   |
| <b>5-HIAA</b>  | non-LID | 6                      | 6.27     | 0.85    | 0.334                          |                                         |        |         |         |
|                | LID     | 6                      | 6.11     | 0.47    | 0.548                          | t-test                                  | 0.417  | 10      | 0.686   |
| <b>3-OMD</b>   | non-LID | 6                      | 3.54     | 0.60    | 0.312                          |                                         |        |         |         |
|                | LID     | 6                      | 7.66     | 1.30    | 0.321                          | t-test                                  | 7.042  | 7.058   | < 0.001 |
| <b>DA</b>      | non-LID | 6                      | 4.67     | 1.13    | 0.416                          |                                         |        |         |         |
|                | LID     | 6                      | 7.79     | 1.12    | 0.853                          | t-test                                  | 4.807  | 10      | 0.001   |
| <b>DOPAC</b>   | non-LID | 6                      | 4.27     | 0.64    | 0.059                          |                                         |        |         |         |
|                | LID     | 6                      | 5.40     | 0.93    | 0.255                          | t-test                                  | 2.450  | 10      | 0.034   |
| <b>NE</b>      | non-LID | 6                      | 6.54     | 0.53    | 0.151                          |                                         |        |         |         |
|                | LID     | 6                      | 6.71     | 0.54    | 0.993                          | t-test                                  | 0.549  | 10      | 0.595   |
| <b>DOPEG</b>   | non-LID | 6                      | 3.16     | 0.83    | 0.589                          |                                         |        |         |         |
|                | LID     | 6                      | 3.18     | 0.86    | 0.622                          | t-test                                  | 0.034  | 10      | 0.973   |
| <b>L-DOPA</b>  | non-LID | 6                      | 2.84     | 2.57    | 0.252                          |                                         |        |         |         |
|                | LID     | 6                      | 9.69     | 1.96    | 0.766                          | t-test                                  | 5.200  | 10      | < 0.001 |

| Region: Ent    |         | Descriptive statistics |          |         | Normality test<br>Shapiro-Wilk | Hypothesis test between non-LID and LID |       |         |         |
|----------------|---------|------------------------|----------|---------|--------------------------------|-----------------------------------------|-------|---------|---------|
| Group          | N       | Mean                   | Std. dev | p-value | Hypothesis test                | t/U-value                               | df    | p-value |         |
| <b>GABA</b>    | non-LID | 6                      | 10.26    | 0.44    | 0.393                          |                                         |       |         |         |
|                | LID     | 6                      | 10.02    | 0.24    | 0.135                          | t-test                                  | 1.163 | 10      | 0.272   |
| <b>Taurine</b> | non-LID | 6                      | 7.51     | 0.39    | 0.838                          |                                         |       |         |         |
|                | LID     | 6                      | 7.28     | 0.27    | 0.508                          | t-test                                  | 1.209 | 10      | 0.254   |
| <b>3-MT</b>    | non-LID | 6                      | -2.26    | 1.76    | 0.750                          |                                         |       |         |         |
|                | LID     | 6                      | 2.67     | 2.74    | 0.340                          | t-test                                  | 3.706 | 10      | 0.004   |
| <b>5-HIAL</b>  | non-LID | 6                      | 2.26     | 0.75    | 0.521                          |                                         |       |         |         |
|                | LID     | 6                      | 1.95     | 0.60    | 0.099                          | t-test                                  | 0.785 | 10      | 0.450   |
| <b>5-HT</b>    | non-LID | 6                      | 6.66     | 0.70    | 0.256                          |                                         |       |         |         |
|                | LID     | 6                      | 6.01     | 0.40    | 0.400                          | t-test                                  | 1.999 | 10      | 0.074   |
| <b>HVA</b>     | non-LID | 6                      | 5.70     | 0.93    | 0.492                          |                                         |       |         |         |
|                | LID     | 6                      | 6.18     | 1.10    | 0.631                          | t-test                                  | 0.819 | 10      | 0.432   |
| <b>MOPEG</b>   | non-LID | 6                      | 2.28     | 0.59    | 0.964                          |                                         |       |         |         |
|                | LID     | 6                      | 1.96     | 0.77    | 0.336                          | t-test                                  | 0.802 | 10      | 0.441   |
| <b>5-HIAA</b>  | non-LID | 6                      | 5.21     | 0.86    | 0.203                          |                                         |       |         |         |
|                | LID     | 6                      | 4.93     | 0.56    | 0.416                          | t-test                                  | 0.667 | 10      | 0.520   |
| <b>3-OMD</b>   | non-LID | 6                      | 4.50     | 0.47    | 0.868                          |                                         |       |         |         |
|                | LID     | 6                      | 8.16     | 1.26    | 0.166                          | t-test                                  | 6.682 | 6.39    | < 0.001 |
| <b>DA</b>      | non-LID | 6                      | 3.95     | 1.32    | 0.532                          |                                         |       |         |         |
|                | LID     | 6                      | 7.73     | 1.40    | 0.493                          | t-test                                  | 4.812 | 10      | 0.001   |
| <b>DOPAC</b>   | non-LID | 6                      | 4.50     | 0.60    | 0.557                          |                                         |       |         |         |
|                | LID     | 6                      | 5.38     | 1.20    | 0.726                          | t-test                                  | 1.602 | 10      | 0.140   |
| <b>NE</b>      | non-LID | 6                      | 6.23     | 0.96    | 0.392                          |                                         |       |         |         |
|                | LID     | 6                      | 5.63     | 0.84    | 0.471                          | t-test                                  | 1.162 | 10      | 0.272   |
| <b>DOPEG</b>   | non-LID | 6                      | 3.63     | 0.90    | 0.138                          |                                         |       |         |         |
|                | LID     | 6                      | 3.17     | 0.49    | 0.920                          | t-test                                  | 1.089 | 10      | 0.302   |
| <b>L-DOPA</b>  | non-LID | 6                      | 3.94     | 2.76    | 0.158                          |                                         |       |         |         |
|                | LID     | 6                      | 10.23    | 1.85    | 0.769                          | t-test                                  | 4.631 | 10      | 0.001   |

| <b>Region: GPe</b> |          | <b>Descriptive statistics</b> |                 |                     | <b>Normality test</b> | <b>Hypothesis test between non-LID and LID</b> |                  |           |                |
|--------------------|----------|-------------------------------|-----------------|---------------------|-----------------------|------------------------------------------------|------------------|-----------|----------------|
| <b>Group</b>       | <b>N</b> | <b>Mean</b>                   | <b>Std. dev</b> | <b>Shapiro-Wilk</b> | <b>p-value</b>        | <b>Hypothesis test</b>                         | <b>t/U-value</b> | <b>df</b> | <b>p-value</b> |
| <b>GABA</b>        | non-LID  | 6                             | 11.47           | 0.22                | 0.542                 |                                                |                  |           |                |
|                    | LID      | 6                             | 11.54           | 0.28                | 0.227                 | t-test                                         | 0.518            | 10        | 0.616          |
| <b>Taurine</b>     | non-LID  | 6                             | 7.65            | 0.50                | 0.615                 |                                                |                  |           |                |
|                    | LID      | 6                             | 7.60            | 0.48                | 0.973                 | t-test                                         | 0.162            | 10        | 0.875          |
| <b>3-MT</b>        | non-LID  | 6                             | 0.33            | 1.65                | 0.533                 |                                                |                  |           |                |
|                    | LID      | 6                             | 2.83            | 2.17                | 0.489                 | t-test                                         | 2.240            | 10        | 0.049          |
| <b>5-HIAL</b>      | non-LID  | 6                             | 1.21            | 0.77                | 0.745                 |                                                |                  |           |                |
|                    | LID      | 6                             | 1.61            | 1.16                | 0.240                 | t-test                                         | 0.694            | 10        | 0.503          |
| <b>5-HT</b>        | non-LID  | 6                             | 6.08            | 0.68                | 0.778                 |                                                |                  |           |                |
|                    | LID      | 6                             | 6.07            | 0.91                | 0.305                 | t-test                                         | 0.014            | 10        | 0.989          |
| <b>HVA</b>         | non-LID  | 6                             | 8.04            | 0.86                | 0.284                 |                                                |                  |           |                |
|                    | LID      | 6                             | 8.18            | 1.23                | 0.716                 | t-test                                         | 0.238            | 10        | 0.817          |
| <b>MOPEG</b>       | non-LID  | 6                             | 2.00            | 0.40                | 0.246                 |                                                |                  |           |                |
|                    | LID      | 6                             | 2.15            | 0.76                | 0.235                 | t-test                                         | 0.443            | 10        | 0.667          |
| <b>5-HIAA</b>      | non-LID  | 6                             | 6.76            | 0.41                | 0.705                 |                                                |                  |           |                |
|                    | LID      | 6                             | 6.85            | 0.70                | 0.410                 | t-test                                         | 0.270            | 10        | 0.793          |
| <b>3-OMD</b>       | non-LID  | 6                             | 3.71            | 0.78                | 0.442                 |                                                |                  |           |                |
|                    | LID      | 6                             | 7.75            | 1.47                | 0.434                 | t-test                                         | 5.929            | 7.63      | < 0.001        |
| <b>DA</b>          | non-LID  | 6                             | 5.27            | 1.21                | 0.079                 |                                                |                  |           |                |
|                    | LID      | 6                             | 7.91            | 1.91                | 0.649                 | t-test                                         | 2.860            | 10        | 0.017          |
| <b>DOPAC</b>       | non-LID  | 6                             | 3.85            | 0.53                | 0.373                 |                                                |                  |           |                |
|                    | LID      | 6                             | 5.09            | 1.63                | 0.292                 | t-test                                         | 1.764            | 6.054     | 0.128          |
| <b>NE</b>          | non-LID  | 6                             | 3.45            | 0.52                | 0.418                 |                                                |                  |           |                |
|                    | LID      | 6                             | 3.50            | 1.44                | 0.911                 | t-test                                         | 0.088            | 10        | 0.931          |
| <b>DOPEG</b>       | non-LID  | 6                             | 2.34            | 0.59                | 0.989                 |                                                |                  |           |                |
|                    | LID      | 6                             | 2.42            | 0.69                | 0.320                 | t-test                                         | 0.213            | 10        | 0.835          |
| <b>L-DOPA</b>      | non-LID  | 6                             | 2.94            | 1.90                | 0.422                 |                                                |                  |           |                |
|                    | LID      | 6                             | 9.67            | 2.24                | 0.724                 | t-test                                         | 5.625            | 10        | < 0.001        |

| <b>Region: GPi</b> |          | <b>Descriptive statistics</b> |                 |                     | <b>Normality test</b> | <b>Hypothesis test between non-LID and LID</b> |                  |           |                |
|--------------------|----------|-------------------------------|-----------------|---------------------|-----------------------|------------------------------------------------|------------------|-----------|----------------|
| <b>Group</b>       | <b>N</b> | <b>Mean</b>                   | <b>Std. dev</b> | <b>Shapiro-Wilk</b> | <b>p-value</b>        | <b>Hypothesis test</b>                         | <b>t/U-value</b> | <b>df</b> | <b>p-value</b> |
| <b>GABA</b>        | non-LID  | 6                             | 11.15           | 0.17                | 0.521                 |                                                |                  |           |                |
|                    | LID      | 6                             | 11.41           | 0.29                | 0.463                 | t-test                                         | 1.853            | 10        | 0.094          |
| <b>Taurine</b>     | non-LID  | 6                             | 7.33            | 0.50                | 0.945                 |                                                |                  |           |                |
|                    | LID      | 6                             | 7.39            | 0.45                | 0.971                 | t-test                                         | 0.195            | 10        | 0.849          |
| <b>3-MT</b>        | non-LID  | 6                             | -1.95           | 1.77                | 0.150                 |                                                |                  |           |                |
|                    | LID      | 6                             | 3.44            | 1.96                | 0.169                 | t-test                                         | 4.990            | 10        | 0.001          |
| <b>5-HIAL</b>      | non-LID  | 6                             | 1.32            | 0.84                | 0.462                 |                                                |                  |           |                |
|                    | LID      | 6                             | 1.67            | 1.23                | 0.141                 | t-test                                         | 0.570            | 10        | 0.581          |
| <b>5-HT</b>        | non-LID  | 6                             | 6.24            | 0.48                | 0.120                 |                                                |                  |           |                |
|                    | LID      | 6                             | 6.44            | 0.93                | 0.218                 | t-test                                         | 0.475            | 10        | 0.645          |
| <b>HVA</b>         | non-LID  | 6                             | 7.38            | 0.79                | 0.090                 |                                                |                  |           |                |
|                    | LID      | 6                             | 7.89            | 1.19                | 0.412                 | t-test                                         | 0.887            | 10        | 0.396          |
| <b>MOPEG</b>       | non-LID  | 6                             | 1.56            | 0.66                | 0.302                 |                                                |                  |           |                |
|                    | LID      | 6                             | 1.88            | 0.84                | 0.390                 | t-test                                         | 0.731            | 10        | 0.481          |
| <b>5-HIAA</b>      | non-LID  | 6                             | 6.93            | 0.50                | 0.476                 |                                                |                  |           |                |
|                    | LID      | 6                             | 7.22            | 0.80                | 0.320                 | t-test                                         | 0.760            | 10        | 0.465          |
| <b>3-OMD</b>       | non-LID  | 6                             | 3.42            | 0.99                | 0.200                 |                                                |                  |           |                |
|                    | LID      | 6                             | 7.74            | 1.53                | 0.379                 | t-test                                         | 5.797            | 10        | < 0.001        |
| <b>DA</b>          | non-LID  | 6                             | 5.17            | 1.33                | 0.101                 |                                                |                  |           |                |
|                    | LID      | 6                             | 8.54            | 1.59                | 0.732                 | t-test                                         | 3.973            | 10        | 0.003          |
| <b>DOPAC</b>       | non-LID  | 6                             | 3.86            | 0.76                | 0.959                 |                                                |                  |           |                |
|                    | LID      | 6                             | 5.62            | 1.72                | 0.780                 | t-test                                         | 2.289            | 6.871     | 0.057          |
| <b>NE</b>          | non-LID  | 6                             | 3.78            | 0.94                | 0.317                 |                                                |                  |           |                |
|                    | LID      | 6                             | 3.87            | 1.49                | 0.870                 | t-test                                         | 0.119            | 10        | 0.908          |
| <b>DOPEG</b>       | non-LID  | 6                             | 2.47            | 0.84                | 0.783                 |                                                |                  |           |                |
|                    | LID      | 6                             | 2.64            | 0.87                | 0.748                 | t-test                                         | 0.348            | 10        | 0.735          |
| <b>L-DOPA</b>      | non-LID  | 6                             | 2.19            | 3.34                | 0.169                 |                                                |                  |           |                |
|                    | LID      | 6                             | 9.73            | 2.28                | 0.676                 | t-test                                         | 4.561            | 10        | 0.001          |

| <b>Region: Hip</b> |          | <b>Descriptive statistics</b> |                 |                     | <b>Normality test</b> | <b>Hypothesis test between non-LID and LID</b> |                  |           |                |
|--------------------|----------|-------------------------------|-----------------|---------------------|-----------------------|------------------------------------------------|------------------|-----------|----------------|
| <b>Group</b>       | <b>N</b> | <b>Mean</b>                   | <b>Std. dev</b> | <b>Shapiro-Wilk</b> | <b>p-value</b>        | <b>Hypothesis test</b>                         | <b>t/U-value</b> | <b>df</b> | <b>p-value</b> |
| <b>GABA</b>        | non-LID  | 5                             | 10.25           | 0.62                | 0.097                 |                                                |                  |           |                |
|                    | LID      | 6                             | 10.16           | 0.16                | 0.895                 | t-test                                         | 0.338            | 4.451     | 0.751          |
| <b>Taurine</b>     | non-LID  | 5                             | 7.67            | 0.29                | 0.693                 |                                                |                  |           |                |
|                    | LID      | 6                             | 7.74            | 0.38                | 0.188                 | t-test                                         | 0.367            | 9         | 0.722          |
| <b>3-MT</b>        | non-LID  | 5                             | -1.99           | 0.83                | 0.044                 |                                                |                  |           |                |
|                    | LID      | 6                             | 2.65            | 1.86                | 0.929                 | Mann-Whitney U                                 | 0.000            | NA        | 0.004          |
| <b>5-HIAL</b>      | non-LID  | 5                             | 2.56            | 1.22                | 0.665                 |                                                |                  |           |                |
|                    | LID      | 6                             | 2.36            | 0.74                | 0.443                 | t-test                                         | 0.334            | 9         | 0.746          |
| <b>5-HT</b>        | non-LID  | 5                             | 6.37            | 0.49                | 0.922                 |                                                |                  |           |                |
|                    | LID      | 6                             | 6.25            | 0.19                | 0.555                 | t-test                                         | 0.572            | 9         | 0.581          |
| <b>HVA</b>         | non-LID  | 5                             | 5.76            | 0.81                | 0.933                 |                                                |                  |           |                |
|                    | LID      | 6                             | 6.40            | 0.90                | 0.069                 | t-test                                         | 1.235            | 9         | 0.248          |
| <b>MOPEG</b>       | non-LID  | 5                             | 2.39            | 0.56                | 0.392                 |                                                |                  |           |                |
|                    | LID      | 6                             | 2.15            | 0.94                | 0.574                 | t-test                                         | 0.499            | 9         | 0.630          |
| <b>5-HIAA</b>      | non-LID  | 5                             | 5.90            | 0.79                | 0.196                 |                                                |                  |           |                |
|                    | LID      | 6                             | 5.74            | 0.46                | 0.885                 | t-test                                         | 0.414            | 9         | 0.689          |
| <b>3-OMD</b>       | non-LID  | 5                             | 4.39            | 0.35                | 0.623                 |                                                |                  |           |                |
|                    | LID      | 6                             | 8.18            | 1.32                | 0.248                 | t-test                                         | 6.735            | 5.811     | 0.001          |
| <b>DA</b>          | non-LID  | 5                             | 3.85            | 1.12                | 0.137                 |                                                |                  |           |                |
|                    | LID      | 6                             | 7.75            | 1.22                | 1.000                 | t-test                                         | 5.478            | 9         | < 0.001        |
| <b>DOPAC</b>       | non-LID  | 5                             | 3.85            | 0.76                | 0.120                 |                                                |                  |           |                |
|                    | LID      | 6                             | 5.24            | 1.28                | 0.787                 | t-test                                         | 2.116            | 9         | 0.063          |
| <b>NE</b>          | non-LID  | 5                             | 6.74            | 0.84                | 0.535                 |                                                |                  |           |                |
|                    | LID      | 6                             | 6.14            | 0.90                | 0.606                 | t-test                                         | 1.118            | 9         | 0.293          |
| <b>DOPEG</b>       | non-LID  | 5                             | 3.72            | 1.07                | 0.313                 |                                                |                  |           |                |
|                    | LID      | 6                             | 3.15            | 0.79                | 0.549                 | t-test                                         | 1.001            | 9         | 0.343          |
| <b>L-DOPA</b>      | non-LID  | 5                             | 3.37            | 2.33                | 0.798                 |                                                |                  |           |                |
|                    | LID      | 6                             | 10.00           | 2.04                | 0.605                 | t-test                                         | 5.036            | 9         | 0.001          |

| <b>Region: Hy</b> |              | <b>Descriptive statistics</b> |             |                 | <b>Normality test<br/>Shapiro-Wilk</b> |                        | <b>Hypothesis test between non-LID and LID</b> |           |                |  |
|-------------------|--------------|-------------------------------|-------------|-----------------|----------------------------------------|------------------------|------------------------------------------------|-----------|----------------|--|
|                   | <b>Group</b> | <b>N</b>                      | <b>Mean</b> | <b>Std. dev</b> | <b>p-value</b>                         | <b>Hypothesis test</b> | <b>t/U-value</b>                               | <b>df</b> | <b>p-value</b> |  |
| <b>GABA</b>       | non-LID      | 6                             | 11.15       | 0.36            | 0.010                                  | Mann-Whitney U         | 16.000                                         |           | 0.820          |  |
|                   | LID          | 6                             | 11.00       | 0.09            | 0.791                                  |                        |                                                |           |                |  |
| <b>Taurine</b>    | non-LID      | 6                             | 6.74        | 0.31            | 0.509                                  | t-test                 | 0.049                                          | 10        | 0.962          |  |
|                   | LID          | 6                             | 6.73        | 0.29            | 0.446                                  |                        |                                                |           |                |  |
| <b>3-MT</b>       | non-LID      | 6                             | 0.63        | 1.58            | 0.135                                  | t-test                 | 1.877                                          | 10        | 0.090          |  |
|                   | LID          | 6                             | 2.91        | 2.52            | 0.332                                  |                        |                                                |           |                |  |
| <b>5-HIAL</b>     | non-LID      | 6                             | 3.93        | 1.10            | 0.724                                  | t-test                 | 0.363                                          | 10        | 0.725          |  |
|                   | LID          | 6                             | 3.74        | 0.65            | 0.323                                  |                        |                                                |           |                |  |
| <b>5-HT</b>       | non-LID      | 6                             | 8.71        | 0.37            | 0.537                                  | t-test                 | 0.974                                          | 10        | 0.353          |  |
|                   | LID          | 6                             | 8.44        | 0.58            | 0.249                                  |                        |                                                |           |                |  |
| <b>HVA</b>        | non-LID      | 6                             | 7.38        | 0.66            | 0.761                                  | t-test                 | 1.499                                          | 10        | 0.165          |  |
|                   | LID          | 6                             | 8.25        | 1.26            | 0.212                                  |                        |                                                |           |                |  |
| <b>MOPEG</b>      | non-LID      | 6                             | 4.11        | 0.81            | 0.851                                  | t-test                 | 0.146                                          | 10        | 0.887          |  |
|                   | LID          | 6                             | 4.20        | 1.24            | 0.854                                  |                        |                                                |           |                |  |
| <b>5-HIAA</b>     | non-LID      | 6                             | 7.45        | 0.55            | 0.576                                  | t-test                 | 0.304                                          | 10        | 0.768          |  |
|                   | LID          | 6                             | 7.35        | 0.65            | 0.492                                  |                        |                                                |           |                |  |
| <b>3-OMD</b>      | non-LID      | 6                             | 4.07        | 0.54            | 0.303                                  | t-test                 | 6.146                                          | 10        | < 0.001        |  |
|                   | LID          | 6                             | 7.82        | 1.40            | 0.353                                  |                        |                                                |           |                |  |
| <b>DA</b>         | non-LID      | 6                             | 8.68        | 0.42            | 0.430                                  | t-test                 | 2.790                                          | 10        | 0.019          |  |
|                   | LID          | 6                             | 10.32       | 1.38            | 0.415                                  |                        |                                                |           |                |  |
| <b>DOPAC</b>      | non-LID      | 6                             | 6.10        | 0.83            | 0.668                                  | t-test                 | 2.224                                          | 10        | 0.050          |  |
|                   | LID          | 6                             | 7.78        | 1.65            | 0.623                                  |                        |                                                |           |                |  |
| <b>NE</b>         | non-LID      | 6                             | 11.61       | 0.98            | 0.275                                  | t-test                 | 0.738                                          | 10        | 0.478          |  |
|                   | LID          | 6                             | 11.16       | 1.12            | 0.347                                  |                        |                                                |           |                |  |
| <b>DOPEG</b>      | non-LID      | 6                             | 5.71        | 1.39            | 0.405                                  | t-test                 | 0.311                                          | 10        | 0.762          |  |
|                   | LID          | 6                             | 5.49        | 1.09            | 0.609                                  |                        |                                                |           |                |  |
| <b>L-DOPA</b>     | non-LID      | 6                             | 5.34        | 0.73            | 0.991                                  | t-test                 | 4.606                                          | 10        | < 0.001        |  |
|                   | LID          | 6                             | 9.38        | 2.02            | 0.848                                  |                        |                                                |           |                |  |

| Region: Ins    |         | Descriptive statistics |          |         | Normality test<br>Shapiro-Wilk | Hypothesis test between non-LID and LID |        |         |         |
|----------------|---------|------------------------|----------|---------|--------------------------------|-----------------------------------------|--------|---------|---------|
| Group          | N       | Mean                   | Std. dev | p-value | Hypothesis test                | t/U-value                               | df     | p-value |         |
| <b>GABA</b>    | non-LID | 6                      | 10.13    | 0.36    | 0.551                          |                                         |        |         |         |
|                | LID     | 6                      | 10.07    | 0.21    | 0.672                          | t-test                                  | 0.376  | 10      | 0.715   |
| <b>Taurine</b> | non-LID | 6                      | 7.47     | 0.39    | 0.472                          |                                         |        |         |         |
|                | LID     | 6                      | 7.46     | 0.33    | 0.283                          | t-test                                  | 0.085  | 10      | 0.934   |
| <b>3-MT</b>    | non-LID | 6                      | -0.95    | 0.78    | 0.979                          |                                         |        |         |         |
|                | LID     | 6                      | 1.71     | 2.02    | 0.324                          | t-test                                  | 3.004  | 6.469   | 0.022   |
| <b>5-HIAL</b>  | non-LID | 6                      | 2.06     | 0.57    | 0.990                          |                                         |        |         |         |
|                | LID     | 6                      | 2.21     | 0.52    | 0.522                          | t-test                                  | 0.474  | 10      | 0.646   |
| <b>5-HT</b>    | non-LID | 6                      | 5.76     | 0.40    | 0.790                          |                                         |        |         |         |
|                | LID     | 6                      | 5.04     | 1.38    | 0.005                          | Mann-Whitney U                          | 18.000 | NA      | 1.000   |
| <b>HVA</b>     | non-LID | 6                      | 6.44     | 0.92    | 0.623                          |                                         |        |         |         |
|                | LID     | 6                      | 6.58     | 0.90    | 0.425                          | t-test                                  | 0.276  | 10      | 0.788   |
| <b>MOPEG</b>   | non-LID | 6                      | 2.10     | 0.51    | 0.181                          |                                         |        |         |         |
|                | LID     | 6                      | 1.84     | 0.82    | 0.715                          | t-test                                  | 0.653  | 10      | 0.528   |
| <b>5-HIAA</b>  | non-LID | 6                      | 5.66     | 0.77    | 0.278                          |                                         |        |         |         |
|                | LID     | 6                      | 5.49     | 0.45    | 0.578                          | t-test                                  | 0.444  | 10      | 0.667   |
| <b>3-OMD</b>   | non-LID | 6                      | 4.43     | 0.49    | 0.322                          |                                         |        |         |         |
|                | LID     | 6                      | 8.07     | 1.20    | 0.296                          | t-test                                  | 6.879  | 6.591   | < 0.001 |
| <b>DA</b>      | non-LID | 6                      | 4.46     | 1.21    | 0.826                          |                                         |        |         |         |
|                | LID     | 6                      | 6.98     | 1.17    | 0.639                          | t-test                                  | 3.667  | 10      | 0.004   |
| <b>DOPAC</b>   | non-LID | 6                      | 4.23     | 0.59    | 0.076                          |                                         |        |         |         |
|                | LID     | 6                      | 4.97     | 1.03    | 0.131                          | t-test                                  | 1.524  | 7.99    | 0.166   |
| <b>NE</b>      | non-LID | 6                      | 5.99     | 0.75    | 0.524                          |                                         |        |         |         |
|                | LID     | 6                      | 6.05     | 0.76    | 0.691                          | t-test                                  | 0.157  | 10      | 0.878   |
| <b>DOPEG</b>   | non-LID | 6                      | 3.41     | 0.92    | 0.093                          |                                         |        |         |         |
|                | LID     | 6                      | 3.13     | 0.78    | 0.591                          | t-test                                  | 0.572  | 10      | 0.580   |
| <b>L-DOPA</b>  | non-LID | 6                      | 3.68     | 3.16    | 0.131                          |                                         |        |         |         |
|                | LID     | 6                      | 10.19    | 1.83    | 0.708                          | t-test                                  | 4.363  | 10      | 0.001   |

| <b>Region: ITG</b> |          | <b>Descriptive statistics</b> |                 |                             | <b>Normality test</b>  | <b>Hypothesis test between non-LID and LID</b> |           |                |         |
|--------------------|----------|-------------------------------|-----------------|-----------------------------|------------------------|------------------------------------------------|-----------|----------------|---------|
| <b>Group</b>       | <b>N</b> | <b>Mean</b>                   | <b>Std. dev</b> | <b>Shapiro-Wilk p-value</b> | <b>Hypothesis test</b> | <b>t/U-value</b>                               | <b>df</b> | <b>p-value</b> |         |
| <b>GABA</b>        | non-LID  | 6                             | 10.06           | 0.43                        | 0.995                  |                                                |           |                |         |
|                    | LID      | 6                             | 9.95            | 0.24                        | 0.428                  | t-test                                         | 0.586     | 10             | 0.571   |
| <b>Taurine</b>     | non-LID  | 6                             | 7.54            | 0.39                        | 0.531                  |                                                |           |                |         |
|                    | LID      | 6                             | 7.40            | 0.50                        | 0.192                  | t-test                                         | 0.541     | 10             | 0.600   |
| <b>3-MT</b>        | non-LID  | 6                             | -1.76           | 1.44                        | 0.565                  |                                                |           |                |         |
|                    | LID      | 6                             | 1.51            | 2.61                        | 0.053                  | t-test                                         | 2.684     | 10             | 0.023   |
| <b>5-HIAL</b>      | non-LID  | 6                             | 1.65            | 0.47                        | 0.970                  |                                                |           |                |         |
|                    | LID      | 6                             | 1.63            | 0.81                        | 0.837                  | t-test                                         | 0.033     | 10             | 0.974   |
| <b>5-HT</b>        | non-LID  | 6                             | 5.58            | 0.47                        | 0.089                  |                                                |           |                |         |
|                    | LID      | 6                             | 5.21            | 0.74                        | 0.830                  | t-test                                         | 1.038     | 10             | 0.324   |
| <b>HVA</b>         | non-LID  | 6                             | 5.56            | 0.83                        | 0.764                  |                                                |           |                |         |
|                    | LID      | 6                             | 5.75            | 1.00                        | 0.749                  | t-test                                         | 0.354     | 10             | 0.731   |
| <b>MOPEG</b>       | non-LID  | 6                             | 2.01            | 0.47                        | 0.266                  |                                                |           |                |         |
|                    | LID      | 6                             | 1.78            | 0.67                        | 0.498                  | t-test                                         | 0.689     | 10             | 0.506   |
| <b>5-HIAA</b>      | non-LID  | 6                             | 4.93            | 0.83                        | 0.094                  |                                                |           |                |         |
|                    | LID      | 6                             | 4.75            | 1.01                        | 0.334                  | t-test                                         | 0.346     | 10             | 0.736   |
| <b>3-OMD</b>       | non-LID  | 6                             | 4.26            | 0.45                        | 0.404                  |                                                |           |                |         |
|                    | LID      | 6                             | 8.10            | 1.27                        | 0.287                  | t-test                                         | 6.998     | 10             | < 0.001 |
| <b>DA</b>          | non-LID  | 6                             | 5.11            | 0.84                        | 0.682                  |                                                |           |                |         |
|                    | LID      | 6                             | 7.37            | 1.43                        | 0.224                  | t-test                                         | 3.333     | 10             | 0.008   |
| <b>DOPAC</b>       | non-LID  | 6                             | 4.36            | 0.59                        | 0.164                  |                                                |           |                |         |
|                    | LID      | 6                             | 4.89            | 1.32                        | 0.210                  | t-test                                         | 0.901     | 10             | 0.389   |
| <b>NE</b>          | non-LID  | 6                             | 5.28            | 1.07                        | 0.397                  |                                                |           |                |         |
|                    | LID      | 6                             | 4.78            | 0.86                        | 0.227                  | t-test                                         | 0.900     | 10             | 0.389   |
| <b>DOPEG</b>       | non-LID  | 6                             | 3.39            | 0.68                        | 0.303                  |                                                |           |                |         |
|                    | LID      | 6                             | 2.99            | 0.76                        | 0.514                  | t-test                                         | 0.961     | 10             | 0.359   |
| <b>L-DOPA</b>      | non-LID  | 6                             | 3.90            | 2.77                        | 0.147                  |                                                |           |                |         |
|                    | LID      | 6                             | 10.24           | 1.88                        | 0.660                  | t-test                                         | 4.639     | 10             | < 0.001 |



| <b>Region: MTG</b> |              | <b>Descriptive statistics</b> |             |                 | <b>Normality test</b>       | <b>Hypothesis test between non-LID and LID</b> |                  |           |                |
|--------------------|--------------|-------------------------------|-------------|-----------------|-----------------------------|------------------------------------------------|------------------|-----------|----------------|
|                    | <b>Group</b> | <b>N</b>                      | <b>Mean</b> | <b>Std. dev</b> | <b>Shapiro-Wilk p-value</b> | <b>Hypothesis test</b>                         | <b>t/U-value</b> | <b>df</b> | <b>p-value</b> |
| <b>GABA</b>        | non-LID      | 6                             | 10.14       | 0.32            | 0.417                       |                                                |                  |           |                |
|                    | LID          | 6                             | 10.00       | 0.15            | 0.543                       | t-test                                         | 0.912            | 10        | 0.383          |
| <b>Taurine</b>     | non-LID      | 6                             | 7.59        | 0.34            | 0.629                       |                                                |                  |           |                |
|                    | LID          | 6                             | 7.47        | 0.47            | 0.588                       | t-test                                         | 0.506            | 10        | 0.624          |
| <b>3-MT</b>        | non-LID      | 6                             | -0.39       | 0.84            | 0.668                       |                                                |                  |           |                |
|                    | LID          | 6                             | 1.82        | 1.85            | 0.340                       | t-test                                         | 2.660            | 6.974     | 0.033          |
| <b>5-HIAL</b>      | non-LID      | 6                             | 1.10        | 0.47            | 0.682                       |                                                |                  |           |                |
|                    | LID          | 6                             | 1.55        | 0.72            | 0.782                       | t-test                                         | 1.282            | 10        | 0.229          |
| <b>5-HT</b>        | non-LID      | 6                             | 5.27        | 0.43            | 0.213                       |                                                |                  |           |                |
|                    | LID          | 6                             | 4.90        | 0.92            | 0.332                       | t-test                                         | 0.879            | 10        | 0.400          |
| <b>HVA</b>         | non-LID      | 6                             | 5.57        | 0.75            | 0.201                       |                                                |                  |           |                |
|                    | LID          | 6                             | 5.69        | 0.64            | 0.725                       | t-test                                         | 0.297            | 10        | 0.773          |
| <b>MOPEG</b>       | non-LID      | 6                             | 1.78        | 0.41            | 0.332                       |                                                |                  |           |                |
|                    | LID          | 6                             | 1.63        | 0.71            | 0.719                       | t-test                                         | 0.449            | 10        | 0.663          |
| <b>5-HIAA</b>      | non-LID      | 6                             | 4.64        | 0.90            | 0.140                       |                                                |                  |           |                |
|                    | LID          | 6                             | 4.75        | 0.78            | 0.530                       | t-test                                         | 0.210            | 10        | 0.838          |
| <b>3-OMD</b>       | non-LID      | 6                             | 4.29        | 0.55            | 0.575                       |                                                |                  |           |                |
|                    | LID          | 6                             | 8.11        | 1.22            | 0.173                       | t-test                                         | 6.993            | 6.956     | < 0.001        |
| <b>DA</b>          | non-LID      | 6                             | 5.10        | 0.62            | 0.697                       |                                                |                  |           |                |
|                    | LID          | 6                             | 7.31        | 1.01            | 0.263                       | t-test                                         | 4.572            | 10        | 0.001          |
| <b>DOPAC</b>       | non-LID      | 6                             | 4.34        | 0.68            | 0.069                       |                                                |                  |           |                |
|                    | LID          | 6                             | 4.67        | 0.90            | 0.608                       | t-test                                         | 0.708            | 10        | 0.495          |
| <b>NE</b>          | non-LID      | 6                             | 4.80        | 1.09            | 0.247                       |                                                |                  |           |                |
|                    | LID          | 6                             | 4.51        | 0.73            | 0.099                       | t-test                                         | 0.541            | 10        | 0.600          |
| <b>DOPEG</b>       | non-LID      | 6                             | 3.07        | 0.84            | 0.564                       |                                                |                  |           |                |
|                    | LID          | 6                             | 2.80        | 0.56            | 0.939                       | t-test                                         | 0.644            | 10        | 0.534          |
| <b>L-DOPA</b>      | non-LID      | 6                             | 3.88        | 3.03            | 0.197                       |                                                |                  |           |                |
|                    | LID          | 6                             | 10.33       | 1.90            | 0.812                       | t-test                                         | 4.419            | 10        | 0.001          |

| <b>Region: PoG</b> |          | <b>Descriptive statistics</b> |                 |                     | <b>Normality test</b> | <b>Hypothesis test between non-LID and LID</b> |                  |           |                |
|--------------------|----------|-------------------------------|-----------------|---------------------|-----------------------|------------------------------------------------|------------------|-----------|----------------|
| <b>Group</b>       | <b>N</b> | <b>Mean</b>                   | <b>Std. dev</b> | <b>Shapiro-Wilk</b> | <b>p-value</b>        | <b>Hypothesis test</b>                         | <b>t/U-value</b> | <b>df</b> | <b>p-value</b> |
| <b>GABA</b>        | non-LID  | 5                             | 10.11           | 0.30                | 0.607                 |                                                |                  |           |                |
|                    | LID      | 3                             | 10.06           | 0.15                | 0.646                 | t-test                                         | 0.252            | 6         | 0.810          |
| <b>Taurine</b>     | non-LID  | 5                             | 7.03            | 0.33                | 0.860                 |                                                |                  |           |                |
|                    | LID      | 3                             | 7.37            | 0.31                | 0.813                 | t-test                                         | 1.405            | 6         | 0.210          |
| <b>3-MT</b>        | non-LID  | 5                             | -1.71           | 1.07                | 0.658                 |                                                |                  |           |                |
|                    | LID      | 3                             | 1.88            | 1.48                | 0.164                 | t-test                                         | 4.030            | 6         | 0.007          |
| <b>5-HIAL</b>      | non-LID  | 5                             | 0.86            | 0.49                | 0.432                 |                                                |                  |           |                |
|                    | LID      | 3                             | 1.50            | 0.99                | 0.731                 | t-test                                         | 1.254            | 6         | 0.256          |
| <b>5-HT</b>        | non-LID  | 5                             | 4.85            | 0.54                | 0.479                 |                                                |                  |           |                |
|                    | LID      | 3                             | 3.76            | 1.83                | 0.091                 | t-test                                         | 1.003            | 2.21      | 0.413          |
| <b>HVA</b>         | non-LID  | 5                             | 5.45            | 0.82                | 0.733                 |                                                |                  |           |                |
|                    | LID      | 3                             | 6.05            | 0.67                | 0.377                 | t-test                                         | 1.064            | 6         | 0.328          |
| <b>MOPEG</b>       | non-LID  | 5                             | 1.63            | 0.70                | 0.809                 |                                                |                  |           |                |
|                    | LID      | 3                             | 1.20            | 0.85                | 0.704                 | t-test                                         | 0.795            | 6         | 0.457          |
| <b>5-HIAA</b>      | non-LID  | 5                             | 4.29            | 0.95                | 0.587                 |                                                |                  |           |                |
|                    | LID      | 3                             | 4.81            | 0.41                | 0.533                 | t-test                                         | 0.865            | 6         | 0.420          |
| <b>3-OMD</b>       | non-LID  | 5                             | 3.87            | 0.49                | 0.676                 |                                                |                  |           |                |
|                    | LID      | 3                             | 8.21            | 0.97                | 0.559                 | t-test                                         | 8.599            | 6         | < 0.001        |
| <b>DA</b>          | non-LID  | 5                             | 4.92            | 0.93                | 0.837                 |                                                |                  |           |                |
|                    | LID      | 3                             | 7.52            | 0.95                | 0.702                 | t-test                                         | 3.804            | 6         | 0.009          |
| <b>DOPAC</b>       | non-LID  | 5                             | 4.32            | 0.85                | 0.494                 |                                                |                  |           |                |
|                    | LID      | 3                             | 5.35            | 0.96                | 0.822                 | t-test                                         | 1.582            | 6         | 0.165          |
| <b>NE</b>          | non-LID  | 5                             | 5.73            | 1.13                | 0.483                 |                                                |                  |           |                |
|                    | LID      | 3                             | 6.16            | 0.74                | 0.953                 | t-test                                         | 0.570            | 6         | 0.589          |
| <b>DOPEG</b>       | non-LID  | 5                             | 2.97            | 1.05                | 0.358                 |                                                |                  |           |                |
|                    | LID      | 3                             | 3.30            | 0.74                | 0.678                 | t-test                                         | 0.476            | 6         | 0.651          |
| <b>L-DOPA</b>      | non-LID  | 5                             | 3.24            | 2.95                | 0.608                 |                                                |                  |           |                |
|                    | LID      | 3                             | 10.92           | 1.83                | 0.924                 | t-test                                         | 3.993            | 6         | 0.007          |

| <b>Region: PrG</b> |          | <b>Descriptive statistics</b> |                 |                     | <b>Normality test</b> | <b>Hypothesis test between non-LID and LID</b> |                  |           |                |
|--------------------|----------|-------------------------------|-----------------|---------------------|-----------------------|------------------------------------------------|------------------|-----------|----------------|
| <b>Group</b>       | <b>N</b> | <b>Mean</b>                   | <b>Std. dev</b> | <b>Shapiro-Wilk</b> | <b>p-value</b>        | <b>Hypothesis test</b>                         | <b>t/U-value</b> | <b>df</b> | <b>p-value</b> |
| <b>GABA</b>        | non-LID  | 6                             | 10.11           | 0.40                | 0.855                 |                                                |                  |           |                |
|                    | LID      | 6                             | 10.22           | 0.20                | 0.878                 | t-test                                         | 0.633            | 10        | 0.541          |
| <b>Taurine</b>     | non-LID  | 6                             | 6.99            | 0.49                | 0.428                 |                                                |                  |           |                |
|                    | LID      | 6                             | 7.00            | 0.37                | 0.883                 | t-test                                         | 0.045            | 10        | 0.965          |
| <b>3-MT</b>        | non-LID  | 6                             | -0.71           | 1.65                | 0.322                 |                                                |                  |           |                |
|                    | LID      | 6                             | 1.84            | 1.60                | 0.106                 | t-test                                         | 2.717            | 10        | 0.022          |
| <b>5-HIAL</b>      | non-LID  | 6                             | 0.55            | 0.70                | 0.283                 |                                                |                  |           |                |
|                    | LID      | 6                             | 1.11            | 1.09                | 0.748                 | t-test                                         | 1.050            | 10        | 0.319          |
| <b>5-HT</b>        | non-LID  | 6                             | 4.48            | 0.64                | 0.841                 |                                                |                  |           |                |
|                    | LID      | 6                             | 3.81            | 1.12                | 0.411                 | t-test                                         | 1.262            | 10        | 0.236          |
| <b>HVA</b>         | non-LID  | 6                             | 5.59            | 0.91                | 0.762                 |                                                |                  |           |                |
|                    | LID      | 6                             | 6.04            | 0.74                | 0.538                 | t-test                                         | 0.933            | 10        | 0.373          |
| <b>MOPEG</b>       | non-LID  | 6                             | 1.34            | 0.73                | 0.744                 |                                                |                  |           |                |
|                    | LID      | 6                             | 1.37            | 0.78                | 0.266                 | t-test                                         | 0.074            | 10        | 0.942          |
| <b>5-HIAA</b>      | non-LID  | 6                             | 3.85            | 0.94                | 0.755                 |                                                |                  |           |                |
|                    | LID      | 6                             | 4.33            | 0.78                | 0.039                 | Mann-Whitney U                                 | 13.000           | NA        | 0.485          |
| <b>3-OMD</b>       | non-LID  | 6                             | 3.72            | 0.62                | 0.725                 |                                                |                  |           |                |
|                    | LID      | 6                             | 7.86            | 1.29                | 0.164                 | t-test                                         | 7.087            | 7.169     | < 0.001        |
| <b>DA</b>          | non-LID  | 6                             | 5.93            | 0.96                | 0.543                 |                                                |                  |           |                |
|                    | LID      | 6                             | 7.48            | 1.19                | 0.673                 | t-test                                         | 2.481            | 10        | 0.033          |
| <b>DOPAC</b>       | non-LID  | 6                             | 4.45            | 0.83                | 0.143                 |                                                |                  |           |                |
|                    | LID      | 6                             | 5.22            | 1.07                | 0.763                 | t-test                                         | 1.383            | 10        | 0.197          |
| <b>NE</b>          | non-LID  | 6                             | 6.16            | 1.04                | 0.408                 |                                                |                  |           |                |
|                    | LID      | 6                             | 6.32            | 0.65                | 0.800                 | t-test                                         | 0.308            | 10        | 0.764          |
| <b>DOPEG</b>       | non-LID  | 6                             | 3.29            | 0.90                | 0.496                 |                                                |                  |           |                |
|                    | LID      | 6                             | 3.24            | 0.70                | 0.122                 | t-test                                         | 0.104            | 10        | 0.919          |
| <b>L-DOPA</b>      | non-LID  | 6                             | 3.53            | 3.00                | 0.190                 |                                                |                  |           |                |
|                    | LID      | 6                             | 10.29           | 1.93                | 0.793                 | t-test                                         | 4.636            | 10        | 0.001          |

| <b>Region: Put</b> |          | <b>Descriptive statistics</b> |                 |                     | <b>Normality test</b> | <b>Hypothesis test between non-LID and LID</b> |                  |           |                |
|--------------------|----------|-------------------------------|-----------------|---------------------|-----------------------|------------------------------------------------|------------------|-----------|----------------|
| <b>Group</b>       | <b>N</b> | <b>Mean</b>                   | <b>Std. dev</b> | <b>Shapiro-Wilk</b> | <b>p-value</b>        | <b>Hypothesis test</b>                         | <b>t/U-value</b> | <b>df</b> | <b>p-value</b> |
| <b>GABA</b>        | non-LID  | 6                             | 10.54           | 0.37                | 0.939                 |                                                |                  |           |                |
|                    | LID      | 6                             | 10.60           | 0.19                | 0.589                 | t-test                                         | 0.331            | 10        | 0.747          |
| <b>Taurine</b>     | non-LID  | 6                             | 7.88            | 0.44                | 0.349                 |                                                |                  |           |                |
|                    | LID      | 6                             | 7.85            | 0.33                | 0.852                 | t-test                                         | 0.107            | 10        | 0.917          |
| <b>3-MT</b>        | non-LID  | 6                             | 5.43            | 1.61                | 0.316                 |                                                |                  |           |                |
|                    | LID      | 6                             | 5.60            | 1.56                | 0.512                 | t-test                                         | 0.190            | 10        | 0.853          |
| <b>5-HIAL</b>      | non-LID  | 6                             | 2.14            | 0.87                | 0.844                 |                                                |                  |           |                |
|                    | LID      | 6                             | 2.19            | 0.74                | 0.287                 | t-test                                         | 0.105            | 10        | 0.918          |
| <b>5-HT</b>        | non-LID  | 6                             | 5.95            | 0.53                | 0.994                 |                                                |                  |           |                |
|                    | LID      | 6                             | 5.97            | 0.64                | 0.686                 | t-test                                         | 0.050            | 10        | 0.961          |
| <b>HVA</b>         | non-LID  | 6                             | 8.82            | 1.11                | 0.695                 |                                                |                  |           |                |
|                    | LID      | 6                             | 8.65            | 1.17                | 0.805                 | t-test                                         | 0.262            | 10        | 0.798          |
| <b>MOPEG</b>       | non-LID  | 6                             | 1.72            | 0.29                | 0.398                 |                                                |                  |           |                |
|                    | LID      | 6                             | 1.62            | 0.74                | 0.923                 | t-test                                         | 0.321            | 10        | 0.755          |
| <b>5-HIAA</b>      | non-LID  | 6                             | 6.42            | 0.69                | 0.320                 |                                                |                  |           |                |
|                    | LID      | 6                             | 6.45            | 0.42                | 0.314                 | t-test                                         | 0.087            | 10        | 0.932          |
| <b>3-OMD</b>       | non-LID  | 6                             | 4.19            | 0.54                | 0.514                 |                                                |                  |           |                |
|                    | LID      | 6                             | 8.03            | 1.24                | 0.133                 | t-test                                         | 6.961            | 6.81      | < 0.001        |
| <b>DA</b>          | non-LID  | 6                             | 8.17            | 1.96                | 0.351                 |                                                |                  |           |                |
|                    | LID      | 6                             | 9.93            | 2.34                | 0.601                 | t-test                                         | 1.416            | 10        | 0.187          |
| <b>DOPAC</b>       | non-LID  | 6                             | 5.64            | 1.22                | 0.304                 |                                                |                  |           |                |
|                    | LID      | 6                             | 6.66            | 1.61                | 0.141                 | t-test                                         | 1.237            | 10        | 0.244          |
| <b>NE</b>          | non-LID  | 6                             | 3.43            | 0.52                | 0.756                 |                                                |                  |           |                |
|                    | LID      | 6                             | 3.43            | 0.80                | 0.481                 | t-test                                         | 0.010            | 10        | 0.992          |
| <b>DOPEG</b>       | non-LID  | 6                             | 2.34            | 0.78                | 0.672                 |                                                |                  |           |                |
|                    | LID      | 6                             | 2.57            | 0.89                | 0.607                 | t-test                                         | 0.458            | 10        | 0.657          |
| <b>L-DOPA</b>      | non-LID  | 6                             | 4.31            | 1.56                | 0.847                 |                                                |                  |           |                |
|                    | LID      | 6                             | 10.15           | 1.97                | 0.956                 | t-test                                         | 5.712            | 10        | < 0.001        |

| <b>Region: STG</b> |          | <b>Descriptive statistics</b> |                 |                     | <b>Normality test</b> | <b>Hypothesis test between non-LID and LID</b> |                  |           |                |
|--------------------|----------|-------------------------------|-----------------|---------------------|-----------------------|------------------------------------------------|------------------|-----------|----------------|
| <b>Group</b>       | <b>N</b> | <b>Mean</b>                   | <b>Std. dev</b> | <b>Shapiro-Wilk</b> | <b>p-value</b>        | <b>Hypothesis test</b>                         | <b>t/U-value</b> | <b>df</b> | <b>p-value</b> |
| <b>GABA</b>        | non-LID  | 6                             | 10.10           | 0.35                | 0.747                 |                                                |                  |           |                |
|                    | LID      | 6                             | 10.05           | 0.16                | 0.558                 | t-test                                         | 0.351            | 10        | 0.733          |
| <b>Taurine</b>     | non-LID  | 6                             | 7.56            | 0.33                | 0.269                 |                                                |                  |           |                |
|                    | LID      | 6                             | 7.47            | 0.41                | 0.553                 | t-test                                         | 0.429            | 10        | 0.677          |
| <b>3-MT</b>        | non-LID  | 6                             | -1.15           | 1.06                | 0.243                 |                                                |                  |           |                |
|                    | LID      | 6                             | 1.48            | 2.23                | 0.285                 | t-test                                         | 2.615            | 10        | 0.026          |
| <b>5-HIAL</b>      | non-LID  | 6                             | 1.26            | 0.50                | 0.346                 |                                                |                  |           |                |
|                    | LID      | 6                             | 1.75            | 0.65                | 0.397                 | t-test                                         | 1.474            | 10        | 0.171          |
| <b>5-HT</b>        | non-LID  | 6                             | 5.28            | 0.49                | 0.755                 |                                                |                  |           |                |
|                    | LID      | 6                             | 4.93            | 0.83                | 0.132                 | t-test                                         | 0.893            | 10        | 0.393          |
| <b>HVA</b>         | non-LID  | 6                             | 5.71            | 0.73                | 0.397                 |                                                |                  |           |                |
|                    | LID      | 6                             | 5.97            | 0.71                | 0.085                 | t-test                                         | 0.643            | 10        | 0.535          |
| <b>MOPEG</b>       | non-LID  | 6                             | 1.87            | 0.40                | 0.922                 |                                                |                  |           |                |
|                    | LID      | 6                             | 1.78            | 0.65                | 0.962                 | t-test                                         | 0.298            | 10        | 0.771          |
| <b>5-HIAA</b>      | non-LID  | 6                             | 4.84            | 0.90                | 0.157                 |                                                |                  |           |                |
|                    | LID      | 6                             | 5.07            | 0.60                | 0.169                 | t-test                                         | 0.513            | 10        | 0.619          |
| <b>3-OMD</b>       | non-LID  | 6                             | 4.36            | 0.47                | 0.201                 |                                                |                  |           |                |
|                    | LID      | 6                             | 8.13            | 1.22                | 0.223                 | t-test                                         | 7.082            | 10        | < 0.001        |
| <b>DA</b>          | non-LID  | 6                             | 4.91            | 0.55                | 0.686                 |                                                |                  |           |                |
|                    | LID      | 6                             | 7.20            | 1.02                | 0.326                 | t-test                                         | 4.849            | 10        | 0.001          |
| <b>DOPAC</b>       | non-LID  | 6                             | 4.27            | 0.72                | 0.532                 |                                                |                  |           |                |
|                    | LID      | 6                             | 4.81            | 1.02                | 0.801                 | t-test                                         | 1.056            | 10        | 0.316          |
| <b>NE</b>          | non-LID  | 6                             | 4.90            | 1.19                | 0.620                 |                                                |                  |           |                |
|                    | LID      | 6                             | 4.88            | 0.80                | 0.981                 | t-test                                         | 0.035            | 10        | 0.973          |
| <b>DOPEG</b>       | non-LID  | 6                             | 3.06            | 0.79                | 0.438                 |                                                |                  |           |                |
|                    | LID      | 6                             | 2.96            | 0.70                | 0.721                 | t-test                                         | 0.232            | 10        | 0.821          |
| <b>L-DOPA</b>      | non-LID  | 6                             | 3.77            | 3.18                | 0.144                 |                                                |                  |           |                |
|                    | LID      | 6                             | 10.30           | 1.88                | 0.772                 | t-test                                         | 4.335            | 10        | 0.001          |

| <b>Region: StT</b> |          | <b>Descriptive statistics</b> |                 |                     | <b>Normality test</b> | <b>Hypothesis test between non-LID and LID</b> |                  |           |                |
|--------------------|----------|-------------------------------|-----------------|---------------------|-----------------------|------------------------------------------------|------------------|-----------|----------------|
| <b>Group</b>       | <b>N</b> | <b>Mean</b>                   | <b>Std. dev</b> | <b>Shapiro-Wilk</b> | <b>p-value</b>        | <b>Hypothesis test</b>                         | <b>t/U-value</b> | <b>df</b> | <b>p-value</b> |
| <b>GABA</b>        | non-LID  | 6                             | 10.97           | 0.41                | 0.327                 |                                                |                  |           |                |
|                    | LID      | 6                             | 11.00           | 0.32                | 0.322                 | t-test                                         | 0.146            | 10        | 0.887          |
| <b>Taurine</b>     | non-LID  | 6                             | 7.33            | 0.49                | 0.523                 |                                                |                  |           |                |
|                    | LID      | 6                             | 7.40            | 0.29                | 0.269                 | t-test                                         | 0.315            | 10        | 0.759          |
| <b>3-MT</b>        | non-LID  | 6                             | 4.07            | 0.96                | 0.780                 |                                                |                  |           |                |
|                    | LID      | 6                             | 4.65            | 1.53                | 0.203                 | t-test                                         | 0.778            | 10        | 0.455          |
| <b>5-HIAL</b>      | non-LID  | 6                             | 4.35            | 0.71                | 0.255                 |                                                |                  |           |                |
|                    | LID      | 6                             | 4.11            | 0.42                | 0.704                 | t-test                                         | 0.713            | 10        | 0.492          |
| <b>5-HT</b>        | non-LID  | 6                             | 8.46            | 0.53                | 0.848                 |                                                |                  |           |                |
|                    | LID      | 6                             | 8.27            | 0.47                | 0.040                 | Mann-Whitney U                                 | 15.000           | NA        | 0.699          |
| <b>HVA</b>         | non-LID  | 6                             | 7.93            | 0.96                | 0.276                 |                                                |                  |           |                |
|                    | LID      | 6                             | 8.25            | 1.05                | 0.565                 | t-test                                         | 0.551            | 10        | 0.593          |
| <b>MOPEG</b>       | non-LID  | 6                             | 3.54            | 0.59                | 0.788                 |                                                |                  |           |                |
|                    | LID      | 6                             | 3.65            | 0.83                | 0.409                 | t-test                                         | 0.249            | 10        | 0.808          |
| <b>5-HIAA</b>      | non-LID  | 6                             | 6.80            | 0.47                | 0.660                 |                                                |                  |           |                |
|                    | LID      | 6                             | 6.81            | 0.38                | 0.732                 | t-test                                         | 0.049            | 10        | 0.962          |
| <b>3-OMD</b>       | non-LID  | 6                             | 4.67            | 0.51                | 0.309                 |                                                |                  |           |                |
|                    | LID      | 6                             | 8.47            | 1.35                | 0.295                 | t-test                                         | 6.449            | 6.41      | 0.001          |
| <b>DA</b>          | non-LID  | 6                             | 8.73            | 1.28                | 0.250                 |                                                |                  |           |                |
|                    | LID      | 6                             | 10.48           | 1.12                | 0.406                 | t-test                                         | 2.526            | 10        | 0.030          |
| <b>DOPAC</b>       | non-LID  | 6                             | 6.49            | 1.23                | 0.742                 |                                                |                  |           |                |
|                    | LID      | 6                             | 7.60            | 1.29                | 0.605                 | t-test                                         | 1.527            | 10        | 0.158          |
| <b>NE</b>          | non-LID  | 6                             | 10.04           | 0.79                | 0.327                 |                                                |                  |           |                |
|                    | LID      | 6                             | 10.14           | 0.64                | 0.990                 | t-test                                         | 0.223            | 10        | 0.828          |
| <b>DOPEG</b>       | non-LID  | 6                             | 5.02            | 1.26                | 0.656                 |                                                |                  |           |                |
|                    | LID      | 6                             | 5.27            | 1.06                | 0.579                 | t-test                                         | 0.385            | 10        | 0.708          |
| <b>L-DOPA</b>      | non-LID  | 6                             | 3.94            | 1.46                | 0.516                 |                                                |                  |           |                |
|                    | LID      | 6                             | 9.71            | 2.04                | 0.898                 | t-test                                         | 5.631            | 10        | < 0.001        |

| Region: Thal   |         | Descriptive statistics |          |         | Normality test<br>Shapiro-Wilk | Hypothesis test between non-LID and LID |       |         |         |
|----------------|---------|------------------------|----------|---------|--------------------------------|-----------------------------------------|-------|---------|---------|
| Group          | N       | Mean                   | Std. dev | p-value | Hypothesis test                | t/U-value                               | df    | p-value |         |
| <b>GABA</b>    | non-LID | 6                      | 10.15    | 0.36    | 0.542                          |                                         |       |         |         |
|                | LID     | 6                      | 10.07    | 0.29    | 0.101                          | t-test                                  | 0.426 | 10      | 0.679   |
| <b>Taurine</b> | non-LID | 6                      | 6.75     | 0.39    | 0.978                          |                                         |       |         |         |
|                | LID     | 6                      | 6.64     | 0.32    | 0.519                          | t-test                                  | 0.543 | 10      | 0.599   |
| <b>3-MT</b>    | non-LID | 6                      | -2.33    | 1.84    | 0.219                          |                                         |       |         |         |
|                | LID     | 6                      | 2.25     | 2.10    | 0.349                          | t-test                                  | 4.021 | 10      | 0.002   |
| <b>5-HIAL</b>  | non-LID | 6                      | 1.80     | 1.36    | 0.004                          |                                         |       |         |         |
|                | LID     | 6                      | 1.55     | 0.50    | 0.911                          | Mann-Whitney U                          | 8.000 | NA      | 0.132   |
| <b>5-HT</b>    | non-LID | 6                      | 6.71     | 0.75    | 0.712                          |                                         |       |         |         |
|                | LID     | 6                      | 6.36     | 0.62    | 0.445                          | t-test                                  | 0.890 | 10      | 0.394   |
| <b>HVA</b>     | non-LID | 6                      | 6.81     | 0.84    | 0.130                          |                                         |       |         |         |
|                | LID     | 6                      | 7.30     | 0.99    | 0.101                          | t-test                                  | 0.930 | 10      | 0.374   |
| <b>MOPEG</b>   | non-LID | 6                      | 2.26     | 0.93    | 0.770                          |                                         |       |         |         |
|                | LID     | 6                      | 2.31     | 0.82    | 0.414                          | t-test                                  | 0.104 | 10      | 0.919   |
| <b>5-HIAA</b>  | non-LID | 6                      | 6.93     | 0.69    | 0.984                          |                                         |       |         |         |
|                | LID     | 6                      | 6.85     | 0.71    | 0.196                          | t-test                                  | 0.197 | 10      | 0.848   |
| <b>3-OMD</b>   | non-LID | 6                      | 3.40     | 0.55    | 0.335                          |                                         |       |         |         |
|                | LID     | 6                      | 7.36     | 1.47    | 0.614                          | t-test                                  | 6.199 | 10      | < 0.001 |
| <b>DA</b>      | non-LID | 6                      | 5.21     | 1.64    | 0.753                          |                                         |       |         |         |
|                | LID     | 6                      | 7.95     | 1.37    | 0.941                          | t-test                                  | 3.140 | 10      | 0.011   |
| <b>DOPAC</b>   | non-LID | 6                      | 4.38     | 0.83    | 0.781                          |                                         |       |         |         |
|                | LID     | 6                      | 5.52     | 1.30    | 0.831                          | t-test                                  | 1.818 | 10      | 0.099   |
| <b>NE</b>      | non-LID | 6                      | 8.87     | 1.66    | 0.231                          |                                         |       |         |         |
|                | LID     | 6                      | 7.59     | 1.09    | 0.533                          | t-test                                  | 1.580 | 10      | 0.145   |
| <b>DOPEG</b>   | non-LID | 6                      | 3.66     | 1.00    | 0.886                          |                                         |       |         |         |
|                | LID     | 6                      | 3.34     | 0.80    | 0.064                          | t-test                                  | 0.615 | 10      | 0.552   |
| <b>L-DOPA</b>  | non-LID | 6                      | 3.86     | 1.60    | 0.019                          |                                         |       |         |         |
|                | LID     | 6                      | 9.22     | 2.07    | 0.385                          | Mann-Whitney U                          | 0.000 | NA      | 0.002   |

The table shows number of samples in each group (N), means, standard deviations, results from normality test, test was used to compare metabolite abundance between non-LID and LID, t-value (Student's t-test), U-value (Mann-Whitney U test), degrees of freedom (df, not obtained from Mann-Whitney U test) and p-value of the hypothesis test. A Shapiro-Wilk normality test was performed to determine whether to use a parametric (Student's t-test,  $P > 0.05$ ) or non-parametric (Mann-Whitney U,  $P < 0.05$ ) test for differences between non-LID and LID in 18 brain regions.  $\alpha$  of 0.05 was used.

**Table S3. One-way ANOVA and Tukey post-hoc test of differences in dopamine, L-DOPA, norepinephrine, serotonin and GABA abundance between control, MPTP, non-LID and LID in ten selected regions.**

**a) Dopamine**

| <b>Dopamine - Amyg</b> |    |        |         |         |          |   |
|------------------------|----|--------|---------|---------|----------|---|
| <b>ANOVA table</b>     |    |        |         |         |          |   |
|                        | Df | Sum Sq | Mean Sq | F value | Pr(>F)   |   |
| Group                  | 3  | 6.839  | 2.280   | 2.568   | 8.47E-02 | . |
| Residuals              | 19 | 16.868 | 0.888   |         |          |   |

| <b>Dopamine - Cd</b> |    |         |         |         |          |     |
|----------------------|----|---------|---------|---------|----------|-----|
| <b>ANOVA table</b>   |    |         |         |         |          |     |
|                      | Df | Sum Sq  | Mean Sq | F value | Pr(>F)   |     |
| Group                | 3  | 195.200 | 65.050  | 30.29   | 1.91E-07 | *** |
| Residuals            | 19 | 40.800  | 2.150   |         |          |     |

**Tukey post hoc**

|              | diff   | lwr    | upr    | p adj       |
|--------------|--------|--------|--------|-------------|
| LID-Ctrl     | -5.192 | -7.571 | -2.813 | 3.71E-05    |
| MPTP-Ctrl    | -7.147 | -9.642 | -4.652 | 8.53E-07    |
| non-LID-Ctrl | -6.982 | -9.361 | -4.603 | 5.95E-07    |
| MPTP-LID     | -1.955 | -4.450 | 0.540  | 0.158099171 |
| non-LID-LID  | -1.790 | -4.169 | 0.589  | 0.183980102 |
| non-LID-MPTP | 0.166  | -2.329 | 2.661  | 0.997612122 |

| <b>Dopamine - GPe</b> |    |        |         |         |         |    |
|-----------------------|----|--------|---------|---------|---------|----|
| <b>ANOVA table</b>    |    |        |         |         |         |    |
|                       | Df | Sum Sq | Mean Sq | F value | Pr(>F)  |    |
| Group                 | 3  | 37.104 | 12.368  | 6.486   | 3.31E-3 | ** |
| Residuals             | 19 | 36.228 | 1.907   |         |         |    |

**Tukey post hoc**

|              | diff   | lwr    | upr    | p adj       |
|--------------|--------|--------|--------|-------------|
| LID-Ctrl     | 0.436  | -1.806 | 2.678  | 0.946251647 |
| MPTP-Ctrl    | -2.752 | -5.103 | -0.401 | 0.018405734 |
| non-LID-Ctrl | -1.759 | -4.000 | 0.483  | 0.157459061 |
| MPTP-LID     | -3.188 | -5.539 | -0.837 | 0.005912153 |
| non-LID-LID  | -2.195 | -4.436 | 0.047  | 0.056280316 |
| non-LID-MPTP | 0.994  | -1.358 | 3.345  | 0.641308435 |



**Dopamine - GPi****ANOVA table**

|           | Df | Sum Sq | Mean Sq | F value | Pr(>F)   |     |
|-----------|----|--------|---------|---------|----------|-----|
| Group     | 3  | 44.460 | 14.819  | 8.443   | 9.03E-04 | *** |
| Residuals | 19 | 33.350 | 1.755   |         |          |     |

**Tukey post hoc**

|              | diff   | lwr    | upr    | p adj       |
|--------------|--------|--------|--------|-------------|
| LID-Ctrl     | 1.929  | -0.222 | 4.080  | 0.088408622 |
| MPTP-Ctrl    | -1.626 | -3.882 | 0.630  | 0.213244814 |
| non-LID-Ctrl | -1.270 | -3.421 | 0.881  | 0.370900897 |
| MPTP-LID     | -3.555 | -5.811 | -1.299 | 0.001499554 |
| non-LID-LID  | -3.199 | -5.349 | -1.048 | 0.002611343 |
| non-LID-MPTP | 0.356  | -1.900 | 2.612  | 0.969979764 |

**Dopamine - Hip****Anova table**

|           | Df     | Sum Sq | Mean Sq | F value | Pr(>F)   |     |
|-----------|--------|--------|---------|---------|----------|-----|
| Group     | 3.000  | 73.570 | 24.522  | 14.57   | 5.94E-05 | *** |
| Residuals | 17.000 | 28.610 | 1.683   |         |          |     |

**Tukey post hoc**

|              | diff   | lwr    | upr    | p adj     |
|--------------|--------|--------|--------|-----------|
| LID-Ctrl     | 3.610  | 1.377  | 5.843  | 0.0013334 |
| MPTP-Ctrl    | -1.186 | -3.518 | 1.146  | 0.4899451 |
| non-LID-Ctrl | -0.016 | -2.349 | 2.316  | 0.9999971 |
| MPTP-LID     | -4.796 | -7.029 | -2.563 | 6.313E-05 |
| non-LID-LID  | -3.626 | -5.859 | -1.393 | 0.0012769 |
| non-LID-MPTP | 1.170  | -1.163 | 3.502  | 0.5013787 |

**Dopamine - Hy****ANOVA table**

|           | Df | Sum Sq | Mean Sq | F value | Pr(>F)   |    |
|-----------|----|--------|---------|---------|----------|----|
| Group     | 3  | 17.220 | 5.740   | 5.464   | 7.03E-03 | ** |
| Residuals | 19 | 19.960 | 1.051   |         |          |    |

**Tukey post hoc**

|              | diff   | lwr    | upr    | p adj       |
|--------------|--------|--------|--------|-------------|
| LID-Ctrl     | 1.828  | 0.164  | 3.492  | 0.028274228 |
| MPTP-Ctrl    | -0.444 | -2.190 | 1.301  | 0.889570791 |
| non-LID-Ctrl | 0.121  | -1.543 | 1.785  | 0.996834409 |
| MPTP-LID     | -2.272 | -4.017 | -0.527 | 0.008260413 |
| non-LID-LID  | -1.707 | -3.370 | -0.043 | 0.043221392 |
| non-LID-MPTP | 0.566  | -1.179 | 2.311  | 0.799002155 |

**Dopamine - PrG****ANOVA table**

|           | Df | Sum Sq | Mean Sq | F value | Pr(>F)   |    |
|-----------|----|--------|---------|---------|----------|----|
| Group     | 3  | 18.130 | 6.045   | 5.445   | 7.13E-03 | ** |
| Residuals | 19 | 21.090 | 1.110   |         |          |    |

**Tukey post hoc**

|              | diff   | lwr    | upr    | p adj       |
|--------------|--------|--------|--------|-------------|
| LID-Ctrl     | 1.719  | 0.008  | 3.429  | 0.048659429 |
| MPTP-Ctrl    | -0.743 | -2.537 | 1.051  | 0.65572121  |
| non-LID-Ctrl | 0.169  | -1.542 | 1.879  | 0.9923099   |
| MPTP-LID     | -2.461 | -4.255 | -0.667 | 0.005352515 |
| non-LID-LID  | -1.550 | -3.261 | 0.160  | 0.084027432 |
| non-LID-MPTP | 0.911  | -0.883 | 2.705  | 0.497839125 |

**Dopamine - Put****ANOVA table**

|           | Df | Sum Sq  | Mean Sq | F value | Pr(>F)   |     |
|-----------|----|---------|---------|---------|----------|-----|
| Group     | 3  | 144.730 | 48.240  | 17.75   | 9.72E-06 | *** |
| Residuals | 19 | 51.630  | 2.720   |         |          |     |

**Tukey post hoc**

|              | diff   | lwr    | upr    | p adj       |
|--------------|--------|--------|--------|-------------|
| LID-Ctrl     | -4.239 | -6.915 | -1.563 | 0.001423885 |
| MPTP-Ctrl    | -6.068 | -8.874 | -3.261 | 4.18E-05    |
| non-LID-Ctrl | -6.122 | -8.798 | -3.446 | 2.01E-05    |
| MPTP-LID     | -1.828 | -4.635 | 0.978  | 0.289837261 |
| non-LID-LID  | -1.883 | -4.559 | 0.793  | 0.230775067 |
| non-LID-MPTP | -0.054 | -2.861 | 2.752  | 0.999939867 |

**Dopamine - StT****ANOVA table**

|           | Df | Sum Sq | Mean Sq | F value | Pr(>F)   |   |
|-----------|----|--------|---------|---------|----------|---|
| Group     | 3  | 16.610 | 5.538   | 4.825   | 1.16E-02 | * |
| Residuals | 19 | 21.810 | 1.148   |         |          |   |

**Tukey post hoc**

|              | diff   | lwr    | upr    | p adj       |
|--------------|--------|--------|--------|-------------|
| LID-Ctrl     | 0.203  | -1.536 | 1.942  | 0.98743318  |
| MPTP-Ctrl    | -1.685 | -3.509 | 0.139  | 0.076371313 |
| non-LID-Ctrl | -1.510 | -3.249 | 0.230  | 0.102984123 |
| MPTP-LID     | -1.888 | -3.712 | -0.064 | 0.040928627 |
| non-LID-LID  | -1.712 | -3.452 | 0.027  | 0.05454061  |
| non-LID-MPTP | 0.176  | -1.649 | 2.000  | 0.992832713 |

**Dopamine - Thal****ANOVA table**

|           | Df | Sum Sq | Mean Sq | F value | Pr(>F)   |
|-----------|----|--------|---------|---------|----------|
| Group     | 3  | 6.839  | 2.280   | 2.568   | 8.47E-02 |
| Residuals | 19 | 16.868 | 0.888   |         |          |

**b) L-DOPA****L-DOPA - Amyg****ANOVA table**

|           | Df | Sum Sq  | Mean Sq | F value | Pr(>F)       |
|-----------|----|---------|---------|---------|--------------|
| Group     | 3  | 271.920 | 90.640  | 35.85   | 5.04E-08 *** |
| Residuals | 19 | 48.030  | 2.530   |         |              |

**Tukey post-hoc**

|              | diff   | lwr     | upr    | p adj       |
|--------------|--------|---------|--------|-------------|
| LID-Ctrl     | 7.857  | 5.275   | 10.438 | 3.42858E-07 |
| MPTP-Ctrl    | -1.027 | -3.734  | 1.681  | 0.713451962 |
| non-LID-Ctrl | 2.324  | -0.258  | 4.905  | 0.086780449 |
| MPTP-LID     | -8.883 | -11.590 | -6.176 | 1.07E-07    |
| non-LID-LID  | -5.533 | -8.114  | -2.952 | 4.66E-05    |
| non-LID-MPTP | 3.350  | 0.643   | 6.057  | 0.012267308 |

**L-DOPA - Cd****ANOVA table**

|           | Df | Sum Sq  | Mean Sq | F value | Pr(>F)       |
|-----------|----|---------|---------|---------|--------------|
| Group     | 3  | 295.100 | 98.370  | 32.39   | 1.13E-07 *** |
| Residuals | 19 | 57.700  | 3.040   |         |              |

**Tukey post-hoc**

|              | diff    | lwr     | upr    | p adj       |
|--------------|---------|---------|--------|-------------|
| LID-Ctrl     | 6.273   | 3.444   | 9.102  | 3.02093E-05 |
| MPTP-Ctrl    | -3.931  | -6.898  | -0.964 | 0.007170624 |
| non-LID-Ctrl | 0.642   | -2.187  | 3.471  | 0.918443848 |
| MPTP-LID     | -10.204 | -13.171 | -7.237 | 5.12E-08    |
| non-LID-LID  | -5.631  | -8.460  | -2.802 | 1.16E-04    |
| non-LID-MPTP | 4.573   | 1.606   | 7.540  | 0.001862507 |

**L-DOPA - GPe****ANOVA table**

|           | Df | Sum Sq  | Mean Sq | F value | Pr(>F)   |     |
|-----------|----|---------|---------|---------|----------|-----|
| Group     | 3  | 342.300 | 114.110 | 38.42   | 2.89E-08 | *** |
| Residuals | 19 | 56.400  | 2.970   |         |          |     |

**Tukey post-hoc**

|              | diff   | lwr     | upr    | p adj       |
|--------------|--------|---------|--------|-------------|
| LID-Ctrl     | 9.184  | 6.386   | 11.982 | 1.06795E-07 |
| MPTP-Ctrl    | -0.425 | -3.360  | 2.509  | 0.976451269 |
| non-LID-Ctrl | 2.809  | 0.011   | 5.606  | 0.048921248 |
| MPTP-LID     | -9.610 | -12.544 | -6.675 | 1.11E-07    |
| non-LID-LID  | -6.376 | -9.174  | -3.578 | 2.11E-05    |
| non-LID-MPTP | 3.234  | 0.300   | 6.168  | 0.027680644 |

**L-DOPA - GPi****ANOVA table**

|           | Df | Sum Sq  | Mean Sq | F value | Pr(>F)   |     |
|-----------|----|---------|---------|---------|----------|-----|
| Group     | 3  | 354.500 | 118.170 | 35.59   | 5.34E-08 | *** |
| Residuals | 19 | 63.100  | 3.320   |         |          |     |

**Tukey post-hoc**

|              | diff   | lwr     | upr    | p adj       |
|--------------|--------|---------|--------|-------------|
| LID-Ctrl     | 9.332  | 6.374   | 12.290 | 1.98019E-07 |
| MPTP-Ctrl    | -0.441 | -3.543  | 2.662  | 0.977787391 |
| non-LID-Ctrl | 2.641  | -0.317  | 5.599  | 0.09023911  |
| MPTP-LID     | -9.773 | -12.875 | -6.670 | 2.03E-07    |
| non-LID-LID  | -6.691 | -9.649  | -3.733 | 2.33E-05    |
| non-LID-MPTP | 3.082  | -0.020  | 6.184  | 0.05189595  |

**L-DOPA - Hip****ANOVA table**

|           | Df | Sum Sq  | Mean Sq | F value | Pr(>F)   |     |
|-----------|----|---------|---------|---------|----------|-----|
| Group     | 3  | 293.200 | 97.730  | 35.35   | 1.59E-07 | *** |
| Residuals | 17 | 47.000  | 2.760   |         |          |     |

**Tukey post-hoc**

|              | diff   | lwr     | upr    | p adj       |
|--------------|--------|---------|--------|-------------|
| LID-Ctrl     | 8.651  | 5.789   | 11.513 | 7.58793E-07 |
| MPTP-Ctrl    | -0.262 | -3.251  | 2.727  | 0.994343249 |
| non-LID-Ctrl | 2.160  | -0.829  | 5.150  | 0.207659354 |
| MPTP-LID     | -8.913 | -11.775 | -6.051 | 4.99E-07    |
| non-LID-LID  | -6.490 | -9.352  | -3.628 | 3.29E-05    |
| non-LID-MPTP | 2.423  | -0.566  | 5.412  | 0.13631055  |

**L-DOPA - Hy****ANOVA table**

|           | Df | Sum Sq  | Mean Sq | F value | Pr(>F)   |     |
|-----------|----|---------|---------|---------|----------|-----|
| Group     | 3  | 160.370 | 53.460  | 16.35   | 1.70E-05 | *** |
| Residuals | 19 | 62.130  | 3.270   |         |          |     |

**Tukey post-hoc**

|              | diff   | lwr     | upr    | p adj       |
|--------------|--------|---------|--------|-------------|
| LID-Ctrl     | 5.860  | 2.925   | 8.796  | 0.000112201 |
| MPTP-Ctrl    | -1.088 | -4.166  | 1.991  | 0.75498313  |
| non-LID-Ctrl | 2.033  | -0.902  | 4.969  | 0.242384582 |
| MPTP-LID     | -6.948 | -10.027 | -3.869 | 2.40E-05    |
| non-LID-LID  | -3.827 | -6.763  | -0.892 | 8.17E-03    |
| non-LID-MPTP | 3.121  | 0.042   | 6.200  | 0.046282204 |

**L-DOPA - PrG****ANOVA table**

|           | Df | Sum Sq  | Mean Sq | F value | Pr(>F)   |     |
|-----------|----|---------|---------|---------|----------|-----|
| Group     | 3  | 401.400 | 133.790 | 40.95   | 1.72E-08 | *** |
| Residuals | 19 | 62.100  | 3.270   |         |          |     |

**Tukey post-hoc**

|              | diff    | lwr     | upr    | p adj       |
|--------------|---------|---------|--------|-------------|
| LID-Ctrl     | 9.893   | 6.959   | 12.828 | 7.01863E-08 |
| MPTP-Ctrl    | -0.578  | -3.656  | 2.500  | 0.951179589 |
| non-LID-Ctrl | 3.371   | 0.437   | 6.305  | 0.020981181 |
| MPTP-LID     | -10.471 | -13.549 | -7.394 | 6.07E-08    |
| non-LID-LID  | -6.522  | -9.457  | -3.588 | 2.93E-05    |
| non-LID-MPTP | 3.949   | 0.871   | 7.027  | 0.009276699 |

**L-DOPA - Put****ANOVA table**

|           | Df | Sum Sq  | Mean Sq | F value | Pr(>F)   |     |
|-----------|----|---------|---------|---------|----------|-----|
| Group     | 3  | 245.290 | 81.760  | 27.72   | 3.78E-07 | *** |
| Residuals | 19 | 56.040  | 2.950   |         |          |     |

**Tukey post-hoc**

|              | diff   | lwr     | upr    | p adj       |
|--------------|--------|---------|--------|-------------|
| LID-Ctrl     | 5.552  | 2.764   | 8.340  | 0.000115619 |
| MPTP-Ctrl    | -3.708 | -6.632  | -0.783 | 0.010187509 |
| non-LID-Ctrl | -0.132 | -2.920  | 2.656  | 0.999121497 |
| MPTP-LID     | -9.260 | -12.184 | -6.336 | 1.87E-07    |
| non-LID-LID  | -5.684 | -8.473  | -2.896 | 8.69E-05    |
| non-LID-MPTP | 3.575  | 0.651   | 6.500  | 0.013430817 |

**L-DOPA - StT****ANOVA table**

|           | Df | Sum Sq  | Mean Sq | F value | Pr(>F)   |     |
|-----------|----|---------|---------|---------|----------|-----|
| Group     | 3  | 315.180 | 105.060 | 27.39   | 4.15E-07 | *** |
| Residuals | 19 | 72.890  | 3.840   |         |          |     |

**Tukey post-hoc**

|              | diff   | lwr     | upr    | p adj       |
|--------------|--------|---------|--------|-------------|
| LID-Ctrl     | 8.731  | 5.552   | 11.911 | 1.58897E-06 |
| MPTP-Ctrl    | -0.576 | -3.911  | 2.759  | 0.961327835 |
| non-LID-Ctrl | 3.166  | -0.014  | 6.346  | 0.051256847 |
| MPTP-LID     | -9.307 | -12.642 | -5.972 | 1.25E-06    |
| non-LID-LID  | -5.565 | -8.745  | -2.386 | 5.06E-04    |
| non-LID-MPTP | 3.742  | 0.407   | 7.077  | 0.024603763 |

**L-DOPA - Thal****ANOVA table**

|           | Df | Sum Sq  | Mean Sq | F value | Pr(>F)   |     |
|-----------|----|---------|---------|---------|----------|-----|
| Group     | 3  | 271.920 | 90.640  | 35.85   | 5.04E-08 | *** |
| Residuals | 19 | 48.030  | 2.530   |         |          |     |

**Tukey post-hoc**

|              | diff   | lwr     | upr    | p adj       |
|--------------|--------|---------|--------|-------------|
| LID-Ctrl     | 7.857  | 5.275   | 10.438 | 3.42858E-07 |
| MPTP-Ctrl    | -1.027 | -3.734  | 1.681  | 0.713451962 |
| non-LID-Ctrl | 2.324  | -0.258  | 4.905  | 0.086780449 |
| MPTP-LID     | -8.883 | -11.590 | -6.176 | 1.07E-07    |
| non-LID-LID  | -5.533 | -8.114  | -2.952 | 4.66E-05    |
| non-LID-MPTP | 3.350  | 0.643   | 6.057  | 0.012267308 |

### c) norepinephrine (NE)

| NE - Amyg   |    |        |         |         |        |
|-------------|----|--------|---------|---------|--------|
| ANOVA table |    |        |         |         |        |
|             | Df | Sum Sq | Mean Sq | F value | Pr(>F) |
| Group       | 3  | 2.795  | 0.932   | 2.135   | 0.129  |
| Residuals   | 19 | 8.291  | 0.436   |         |        |

| NE - Cd     |    |        |         |         |          |
|-------------|----|--------|---------|---------|----------|
| ANOVA table |    |        |         |         |          |
|             | Df | Sum Sq | Mean Sq | F value | Pr(>F)   |
| Group       | 3  | 14.520 | 4.839   | 4.476   | 0.0154 * |
| Residuals   | 19 | 20.540 | 1.081   |         |          |

| Tukey post-hoc |        |        |        |           |
|----------------|--------|--------|--------|-----------|
|                | diff   | lwr    | upr    | p adj     |
| LID-Ctrl       | -1.763 | -3.451 | -0.075 | 0.0387653 |
| MPTP-Ctrl      | -1.781 | -3.551 | -0.010 | 0.0483839 |
| non-LID-Ctrl   | -1.872 | -3.560 | -0.184 | 0.0265458 |
| MPTP-LID       | -0.018 | -1.788 | 1.753  | 0.9999919 |
| non-LID-LID    | -0.109 | -1.797 | 1.579  | 0.9977794 |
| non-LID-MPTP   | -0.092 | -1.862 | 1.679  | 0.998857  |

| NE - GPe    |    |        |         |         |        |
|-------------|----|--------|---------|---------|--------|
| ANOVA table |    |        |         |         |        |
|             | Df | Sum Sq | Mean Sq | F value | Pr(>F) |
| Group       | 3  | 5.643  | 1.881   | 1.325   | 0.296  |
| Residuals   | 19 | 26.984 | 1.420   |         |        |

| NE - GPi    |    |        |         |         |        |
|-------------|----|--------|---------|---------|--------|
| ANOVA table |    |        |         |         |        |
|             | Df | Sum Sq | Mean Sq | F value | Pr(>F) |
| Group       | 3  | 1.270  | 0.425   | 0.179   | 0.909  |
| Residuals   | 19 | 44.960 | 2.367   |         |        |

| NE - Hip    |    |        |         |         |        |
|-------------|----|--------|---------|---------|--------|
| ANOVA table |    |        |         |         |        |
|             | Df | Sum Sq | Mean Sq | F value | Pr(>F) |
| Group       | 3  | 0.818  | 0.273   | 0.372   | 0.774  |
| Residuals   | 17 | 12.474 | 0.734   |         |        |

**NE - Hy**  
**ANOVA table**

|           | Df | Sum Sq | Mean Sq | F value | Pr(>F) |
|-----------|----|--------|---------|---------|--------|
| Group     | 3  | 3.150  | 1.051   | 0.489   | 0.694  |
| Residuals | 19 | 40.860 | 2.150   |         |        |

**NE - PrG**  
**ANOVA table**

|           | Df | Sum Sq | Mean Sq | F value | Pr(>F) |
|-----------|----|--------|---------|---------|--------|
| Group     | 3  | 3.225  | 1.075   | 1.343   | 0.29   |
| Residuals | 19 | 15.214 | 0.801   |         |        |

**NE - Put**  
**ANOVA table**

|           | Df | Sum Sq | Mean Sq | F value | Pr(>F)   |
|-----------|----|--------|---------|---------|----------|
| Group     | 3  | 12.620 | 4.208   | 3.866   | 0.0258 * |
| Residuals | 19 | 20.680 | 1.088   |         |          |

**Tukey post-hoc**

|              | diff   | lwr    | upr    | p adj     |
|--------------|--------|--------|--------|-----------|
| LID-Ctrl     | -1.466 | -3.159 | 0.228  | 0.1043669 |
| MPTP-Ctrl    | -1.991 | -3.768 | -0.215 | 0.024747  |
| non-LID-Ctrl | -1.467 | -3.161 | 0.226  | 0.1038695 |
| MPTP-LID     | -0.526 | -2.302 | 1.251  | 0.8386107 |
| non-LID-LID  | -0.002 | -1.695 | 1.692  | 1         |
| non-LID-MPTP | 0.524  | -1.252 | 2.300  | 0.8397713 |

**NE - StT**  
**ANOVA table**

|           | Df | Sum Sq | Mean Sq | F value | Pr(>F) |
|-----------|----|--------|---------|---------|--------|
| Group     | 3  | 0.358  | 0.119   | 0.169   | 0.916  |
| Residuals | 19 | 13.433 | 0.707   |         |        |

**NE - Thal**  
**ANOVA table**

|           | Df | Sum Sq | Mean Sq | F value | Pr(>F) |
|-----------|----|--------|---------|---------|--------|
| Group     | 3  | 2.795  | 0.932   | 2.135   | 0.129  |
| Residuals | 19 | 8.291  | 0.436   |         |        |



#### d) serotonin (5-HT)

##### 5-HT - Amyg ANOVA table

|           | Df     | Sum Sq | Mean Sq | F value | Pr(>F) |
|-----------|--------|--------|---------|---------|--------|
| Group     | 3      | 0.384  | 0.128   | 0.593   | 0.627  |
| Residuals | 19.000 | 4.099  | 0.216   |         |        |

##### 5-HT - Cd ANOVA table

|           | Df | Sum Sq | Mean Sq | F value | Pr(>F) |
|-----------|----|--------|---------|---------|--------|
| Group     | 3  | 2.500  | 0.833   | 1.126   | 0.363  |
| Residuals | 19 | 14.060 | 0.740   |         |        |

##### 5-HT - GPe ANOVA table

|           | Df | Sum Sq | Mean Sq | F value | Pr(>F) |
|-----------|----|--------|---------|---------|--------|
| Group     | 3  | 1.660  | 0.553   | 0.489   | 0.694  |
| Residuals | 19 | 21.500 | 1.132   |         |        |

##### 5-HT - GPI ANOVA table

|           | Df | Sum Sq | Mean Sq | F value | Pr(>F) |
|-----------|----|--------|---------|---------|--------|
| Group     | 3  | 2.055  | 0.685   | 0.766   | 0.527  |
| Residuals | 19 | 16.996 | 0.895   |         |        |

##### 5-HT - Hip ANOVA table

|           | Df | Sum Sq | Mean Sq | F value | Pr(>F) |
|-----------|----|--------|---------|---------|--------|
| Group     | 3  | 0.709  | 0.236   | 0.709   | 0.56   |
| Residuals | 17 | 5.668  | 0.333   |         |        |

##### 5-HT - Hy ANOVA table

|           | Df | Sum Sq | Mean Sq | F value | Pr(>F) |
|-----------|----|--------|---------|---------|--------|
| Group     | 3  | 0.555  | 0.185   | 0.247   | 0.863  |
| Residuals | 19 | 14.237 | 0.749   |         |        |

**5-HT - PrG****ANOVA table**

|           | Df | Sum Sq | Mean Sq | F value | Pr(>F) |
|-----------|----|--------|---------|---------|--------|
| Group     | 3  | 8.825  | 2.942   | 2.96    | 0.0584 |
| Residuals | 19 | 18.881 | 0.994   |         |        |

**5-HT - Put****ANOVA table**

|           | Df | Sum Sq | Mean Sq | F value | Pr(>F) |
|-----------|----|--------|---------|---------|--------|
| Group     | 3  | 1.993  | 0.664   | 1.289   | 0.307  |
| Residuals | 19 | 9.794  | 0.516   |         |        |

**5-HT - StT****ANOVA table**

|           | Df | Sum Sq | Mean Sq | F value | Pr(>F) |
|-----------|----|--------|---------|---------|--------|
| Group     | 3  | 0.794  | 0.265   | 0.578   | 0.636  |
| Residuals | 19 | 8.691  | 0.457   |         |        |

**5-HT - Thal****ANOVA table**

|           | Df | Sum Sq | Mean Sq | F value | Pr(>F) |
|-----------|----|--------|---------|---------|--------|
| Group     | 3  | 0.384  | 0.128   | 0.593   | 0.627  |
| Residuals | 19 | 4.099  | 0.216   |         |        |

## e) GABA

| GABA - Amyg |    |        |         |         |        |
|-------------|----|--------|---------|---------|--------|
| ANOVA table |    |        |         |         |        |
|             | Df | Sum Sq | Mean Sq | F value | Pr(>F) |
| Group       | 3  | 0.7821 | 0.2607  | 1.583   | 0.226  |
| Residuals   | 19 | 3.1283 | 0.1646  |         |        |

| GABA - Cd   |    |        |         |         |            |
|-------------|----|--------|---------|---------|------------|
| ANOVA table |    |        |         |         |            |
|             | Df | Sum Sq | Mean Sq | F value | Pr(>F)     |
| Group       | 3  | 2.117  | 0.7056  | 5.976   | 0.00478 ** |
| Residuals   | 19 | 2.244  | 0.1181  |         |            |

| Tukey post-hoc |        |        |        |           |  |
|----------------|--------|--------|--------|-----------|--|
|                | diff   | lwr    | upr    | p adj     |  |
| LID-Ctrl       | 0.511  | -0.047 | 1.069  | 0.0798039 |  |
| MPTP-Ctrl      | -0.215 | -0.800 | 0.370  | 0.7319558 |  |
| non-LID-Ctrl   | 0.470  | -0.088 | 1.028  | 0.117656  |  |
| MPTP-LID       | -0.726 | -1.311 | -0.141 | 0.012018  |  |
| non-LID-LID    | -0.041 | -0.599 | 0.517  | 0.9967848 |  |
| non-LID-MPTP   | 0.685  | 0.100  | 1.270  | 0.0183663 |  |

| GABA - GPe  |    |        |         |         |              |
|-------------|----|--------|---------|---------|--------------|
| ANOVA table |    |        |         |         |              |
|             | Df | Sum Sq | Mean Sq | F value | Pr(>F)       |
| Group       | 3  | 3.519  | 1.1729  | 8.352   | 0.000956 *** |
| Residuals   | 19 | 2.668  | 0.1404  |         |              |

| Tukey post-hoc |        |        |        |           |  |
|----------------|--------|--------|--------|-----------|--|
|                | diff   | lwr    | upr    | p adj     |  |
| LID-Ctrl       | 0.560  | -0.049 | 1.168  | 0.07807   |  |
| MPTP-Ctrl      | -0.431 | -1.069 | 0.207  | 0.2615525 |  |
| non-LID-Ctrl   | 0.495  | -0.114 | 1.103  | 0.1366587 |  |
| MPTP-LID       | -0.990 | -1.629 | -0.352 | 0.0017373 |  |
| non-LID-LID    | -0.065 | -0.673 | 0.543  | 0.9902841 |  |
| non-LID-MPTP   | 0.926  | 0.287  | 1.564  | 0.0032833 |  |

**GABA - GPI****ANOVA table**

|           | Df | Sum Sq | Mean Sq | F value | Pr(>F)    |
|-----------|----|--------|---------|---------|-----------|
| Group     | 3  | 3.414  | 1.1379  | 6.672   | 0.0029 ** |
| Residuals | 19 | 3.24   | 0.1705  |         |           |

**Tukey post-hoc**

|              | diff   | lwr    | upr    | p adj     |
|--------------|--------|--------|--------|-----------|
| LID-Ctrl     | 0.570  | -0.100 | 1.241  | 0.1127725 |
| MPTP-Ctrl    | -0.489 | -1.192 | 0.214  | 0.2388033 |
| non-LID-Ctrl | 0.326  | -0.344 | 0.997  | 0.5326821 |
| MPTP-LID     | -1.060 | -1.763 | -0.356 | 0.0023077 |
| non-LID-LID  | -0.244 | -0.914 | 0.427  | 0.7385811 |
| non-LID-MPTP | 0.816  | 0.113  | 1.519  | 0.019592  |

**GABA - Hip****ANOVA table**

|           | Df | Sum Sq | Mean Sq | F value | Pr(>F) |
|-----------|----|--------|---------|---------|--------|
| Group     | 3  | 0.744  | 0.2479  | 1.268   | 0.317  |
| Residuals | 17 | 3.325  | 0.1956  |         |        |

**GABA - Hy****ANOVA table**

|           | Df | Sum Sq | Mean Sq | F value | Pr(>F) |
|-----------|----|--------|---------|---------|--------|
| Group     | 3  | 1.154  | 0.3847  | 1.976   | 0.152  |
| Residuals | 19 | 3.699  | 0.1947  |         |        |

**GABA - PrG****ANOVA table**

|           | Df | Sum Sq | Mean Sq | F value | Pr(>F)  |
|-----------|----|--------|---------|---------|---------|
| Group     | 3  | 2.996  | 0.9985  | 4.428   | 0.016 * |
| Residuals | 19 | 4.285  | 0.2255  |         |         |

**Tukey post-hoc**

|              | diff   | lwr    | upr    | p adj     |
|--------------|--------|--------|--------|-----------|
| LID-Ctrl     | 0.539  | -0.232 | 1.310  | 0.2356129 |
| MPTP-Ctrl    | -0.402 | -1.210 | 0.407  | 0.5160486 |
| non-LID-Ctrl | 0.419  | -0.352 | 1.190  | 0.4409796 |
| MPTP-LID     | -0.941 | -1.749 | -0.132 | 0.0192247 |
| non-LID-LID  | -0.120 | -0.891 | 0.651  | 0.9713484 |
| non-LID-MPTP | 0.821  | 0.012  | 1.629  | 0.0458442 |

**GABA - Put****ANOVA table**

|           | Df | Sum Sq | Mean Sq | F value | Pr(>F)  |    |
|-----------|----|--------|---------|---------|---------|----|
| Group     | 3  | 2.848  | 0.9492  | 8.161   | 0.00108 | ** |
| Residuals | 19 | 2.21   | 0.1163  |         |         |    |

**Tukey post-hoc**

|              | diff   | lwr    | upr    | p adj     |
|--------------|--------|--------|--------|-----------|
| LID-Ctrl     | 0.626  | 0.073  | 1.180  | 0.0232971 |
| MPTP-Ctrl    | -0.195 | -0.775 | 0.386  | 0.7823074 |
| non-LID-Ctrl | 0.578  | 0.024  | 1.131  | 0.0389428 |
| MPTP-LID     | -0.821 | -1.402 | -0.240 | 0.004123  |
| non-LID-LID  | -0.048 | -0.602 | 0.505  | 0.9945763 |
| non-LID-MPTP | 0.773  | 0.192  | 1.353  | 0.0069257 |

**GABA - StT****ANOVA table**

|           | Df | Sum Sq | Mean Sq | F value | Pr(>F) |
|-----------|----|--------|---------|---------|--------|
| Group     | 3  | 1.732  | 0.5773  | 1.95    | 0.156  |
| Residuals | 19 | 5.625  | 0.2961  |         |        |

**GABA - Thal****ANOVA table**

|           | Df | Sum Sq | Mean Sq | F value | Pr(>F) |
|-----------|----|--------|---------|---------|--------|
| Group     | 3  | 0.7821 | 0.2607  | 1.583   | 0.226  |
| Residuals | 19 | 3.1283 | 0.1646  |         |        |

ANOVA tests of dopamine, L-DOPA, norepinephrine, serotonin, GABA in control (Ctrl), MPTP, non-LID and LID groups. Significant ANOVA test was followed by a Tukey post-hoc. Diff, difference of the means; lwr, lower level of confidence interval; upr, upper level of the confidence interval; Sq, squares.

**Table S4. Linear regression analysis of conversion of L-DOPA to 3-OMD, L-DOPA to DA and summarised results from hypothesis tests of metabolite ratios between non-LID and LID.**

**a) L-DOPA to 3-OMD**

| <b>LID</b> | <b>Int</b> | <b>SE int</b> | <b>P-int</b> | <b>SI</b> | <b>SE sl</b> | <b>P-sl</b> | <b>Res SE</b> | <b>Adj R<sup>2</sup></b> | <b>DF</b> | <b>Mult R<sup>2</sup></b> | <b>n</b> |
|------------|------------|---------------|--------------|-----------|--------------|-------------|---------------|--------------------------|-----------|---------------------------|----------|
| Amyg       | 2.758      | 1.431         | 0.1262       | 0.566     | 0.146        | 0.0179      | 0.6317        | 0.7369                   | 4         | 0.7896                    | n=6      |
| Cd         | 2.296      | 1.358         | 0.166        | 0.5796    | 0.1276       | 0.0105      | 0.5485        | 0.797                    | 4         | 0.8376                    | n=6      |
| Clau       | 1.753      | 1.2995        | 0.24865      | 0.609     | 0.1318       | 4.621       | 0.00988       | 0.8028                   | 4         | 0.8422                    | n=6      |
| Ctx        | 1.798      | 1.3916        | 0.2659       | 0.6027    | 0.1334       | 0.0107      | 0.5619        | 0.7952                   | 4         | 0.8362                    | n=6      |
| Ent        | 1.9263     | 1.5427        | 0.2899       | 0.6097    | 0.1488       | 0.0149      | 0.6168        | 0.7595                   | 4         | 0.8076                    | n=6      |
| GPe        | 1.8502     | 1.2219        | 0.20456      | 0.6102    | 0.1237       | 0.00785     | 0.6182        | 0.8236                   | 4         | 0.8589                    | n=6      |
| GPI        | 1.7267     | 1.2804        | 0.24878      | 0.6182    | 0.2187       | 0.00863     | 0.6572        | 0.8153                   | 4         | 0.8522                    | n=6      |
| Hip        | 2.1414     | 1.2053        | 0.15026      | 0.6039    | 0.1185       | 0.00701     | 0.5407        | 0.8331                   | 4         | 0.8665                    | n=6      |
| Hy         | 2.0679     | 1.5229        | 0.246        | 0.6137    | 0.1594       | 0.0183      | 0.7192        | 0.7344                   | 4         | 0.7875                    | n=6      |
| Put        | 2.2546     | 1.3993        | 0.1824       | 0.5685    | 0.1357       | 0.0138      | 0.5963        | 0.768                    | 4         | 0.8144                    | n=6      |
| StT        | 2.4717     | 1.1879        | 0.10592      | 0.6183    | 0.1202       | 0.00677     | 0.5475        | 0.8359                   | 4         | 0.8687                    | n=6      |
| Tha        | 1.327      | 1.2842        | 0.35982      | 0.6539    | 0.1364       | 0.00869     | 0.6307        | 0.8147                   | 4         | 0.8517                    | n=6      |

  

| <b>non-LID</b> | <b>Int</b> | <b>SE int</b> | <b>P-int</b> | <b>SI</b> | <b>SE sl</b> | <b>P-sl</b> | <b>Res SE</b> | <b>Adj R<sup>2</sup></b> | <b>DF</b> | <b>Mult R<sup>2</sup></b> | <b>n</b> |
|----------------|------------|---------------|--------------|-----------|--------------|-------------|---------------|--------------------------|-----------|---------------------------|----------|
| Amyg           | 3.528      | 0.579         | 0.00888      | 0.249     | 0.126        | 0.14265     | 0.2987        | 0.4206                   | 3         | 0.5654                    | n=5      |
| Cd             | 3.3918     | 0.3440        | 0.00059      | 0.2606    | 0.0692       | 0.01973     | 0.263         | 0.7246                   | 4         | 0.7797                    | n=6      |
| Clau           | 3.1249     | 0.8087        | 0.0609       | 0.1791    | 0.1826       | 0.4301      | 0.2961        | -0.0127                  | 2         | 0.3248                    | n=4      |
| Ctx            | 2.8913     | 0.3387        | 0.0134       | 0.2857    | 0.0618       | 0.0438      | 0.1271        | 0.8716                   | 2         | 0.9144                    | n=4      |
| Ent            | 3.3996     | 0.8172        | 0.0532       | 0.2473    | 0.1466       | 0.2337      | 0.2231        | 0.3807                   | 2         | 0.5871                    | n=4      |
| GPe            | 2.9779     | 0.1601        | 0.00288      | 0.2973    | 0.0387       | 0.01648     | 0.06883       | 0.951                    | 2         | 0.9673                    | n=4      |
| GPI            | 2.5142     | 0.7645        | 0.0813       | 0.3723    | 0.1843       | 0.1807      | 0.3074        | 0.5068                   | 2         | 0.6712                    | n=4      |
| Hip            | 3.8597     | 0.2451        | 0.0404       | 0.1566    | 0.0493       | 3.178       | 0.1941        | 0.8198                   | 1         | 0.9099                    | n=3      |
| Hy             | 3.5632     | 1.9720        | 0.145        | 0.0951    | 0.3663       | 0.808       | 0.5944        | -0.2293                  | 4         | 0.5944                    | n=6      |
| Put            | 2.8439     | 0.3194        | 0.00088      | 0.3136    | 0.0705       | 0.01123     | 0.2455        | 0.79                     | 4         | 0.832                     | n=6      |
| StT            | 3.3561     | 0.2248        | 0.00012      | 0.3330    | 0.0540       | 0.00352     | 0.1769        | 0.8809                   | 4         | 0.9047                    | n=6      |
| Tha            | 3.8477     | 1.5094        | 0.084        | -0.0559   | 0.3345       | 0.878       | 0.319         | -0.321                   | 3         | 0.0092                    | n=5      |

Results from linear regression analysis. 3-OMD was set as y-variable and L-DOPA was set as x-variable. DF, degrees of freedom; Int, intercept; Res, residuals; SE, Standard error; SI, Slope.

**b) L-DOPA to DA**

| <b>LID</b>  | <b>Int</b> | <b>SE int</b> | <b>P-int</b> | <b>SI</b> | <b>SE sl</b> | <b>P-sl</b> | <b>Res SE</b> | <b>Adj R<sup>2</sup></b> | <b>Mult R<sup>2</sup></b> | <b>DF</b> | <b>n</b> |
|-------------|------------|---------------|--------------|-----------|--------------|-------------|---------------|--------------------------|---------------------------|-----------|----------|
| <b>Amyg</b> | 7.6962     | 0.83095       | 0.000756     | 0.37288   | 0.08478      | 0.011709    | 0.3668        | 0.7858                   | 0.8286                    | 4         | n=6      |
| <b>Cd</b>   | 0.2255     | 3.3152        | 0.949        | 0.8411    | 0.3115       | 0.0541      | 1.339         | 0.5573                   | 0.6458                    | 4         | n=6      |
| <b>Clau</b> | 2.56685    | 0.9474        | 0.05357      | 0.53849   | 0.09611      | 0.00498     | 0.4202        | 0.8587                   | 0.887                     | 4         | n=6      |
| <b>Ctx</b>  | 1.34612    | 0.52488       | 0.062333     | 0.58243   | 0.05031      | 0.000318    | 0.2119        | 0.9638                   | 0.971                     | 4         | n=6      |
| <b>Ent</b>  | 0.06774    | 0.51457       | 0.901627     | 0.74896   | 0.04963      | 0.000112    | 0.2057        | 0.9784                   | 0.9827                    | 4         | n=6      |
| <b>GPe</b>  | 0.3206     | 1.6434        | 0.85482      | 0.7847    | 0.1663       | 0.00919     | 0.8314        | 0.8096                   | 0.8477                    | 4         | n=6      |
| <b>GPi</b>  | 1.9477     | 0.8297        | 0.07873      | 0.678     | 0.0834       | 0.00125     | 0.4259        | 0.9287                   | 0.9429                    | 4         | n=6      |
| <b>Hip</b>  | 2.04153    | 0.88558       | 0.08246      | 0.57125   | 0.08709      | 0.00279     | 0.3973        | 0.8937                   | 0.9149                    | 4         | n=6      |
| <b>Hy</b>   | 4.393      | 1.2317        | 0.02345      | 0.632     | 0.1289       | 0.00803     | 0.5817        | 0.8217                   | 0.8573                    | 4         | n=6      |
| <b>Put</b>  | 1.9124     | 4.5844        | 0.698        | 0.7896    | 0.4446       | 0.15        | 1.954         | 0.3011                   | 0.4409                    | 4         | n=6      |
| <b>StT</b>  | 5.7084     | 1.1962        | 0.00883      | 0.4918    | 0.121        | 0.0153      | 0.5513        | 0.7562                   | 0.805                     | 4         | n=6      |
| <b>Thal</b> | 2.3717     | 1.2641        | 0.1339       | 0.6049    | 0.1343       | 0.0108      | 0.6208        | 0.7942                   | 0.8353                    | 4         | n=6      |

| <b>non-LID</b> | <b>Int</b> | <b>SE int</b> | <b>P-int</b> | <b>SI</b> | <b>SE sl</b> | <b>P-sl</b> | <b>Res SE</b> | <b>Adj R<sup>2</sup></b> | <b>Mult R<sup>2</sup></b> | <b>DF</b> | <b>n</b> |
|----------------|------------|---------------|--------------|-----------|--------------|-------------|---------------|--------------------------|---------------------------|-----------|----------|
| <b>Amyg</b>    | 11.023     | 0.8143        | 0.000872     | -0.201    | 0.1772       | 0.338922    | 0.42          | 0.06712                  | 0.3003                    | 3         | n=5      |
| <b>Cd</b>      | 7.8728     | 2.8702        | 0.0517       | -0.1597   | 0.5779       | 0.796       | 2.194         | -0.2266                  | 0.01873                   | 4         | n=6      |
| <b>Clau</b>    | 3.2972     | 2.4133        | 0.305        | 0.3816    | 0.5449       | 0.556       | 0.8836        | -0.2046                  | 0.1969                    | 2         | n=4      |
| <b>Ctx</b>     | 2.8507     | 1.1858        | 0.138        | 0.4034    | 0.2164       | 0.203       | 0.4449        | 0.4521                   | 0.6347                    | 2         | n=4      |
| <b>Ent</b>     | -3.982     | 10.861        | 0.776        | 1.49      | 1.825        | 0.564       | 0.7145        | -0.2001                  | 0.3999                    | 1         | n=3      |
| <b>GPe</b>     | 5.34827    | 4.17652       | 0.329        | -0.0734   | 1.00795      | 0.949       | 1.795         | -0.496                   | 0.00264                   | 2         | n=4      |
| <b>GPi</b>     | 3.0744     | 3.9616        | 0.519        | 0.5654    | 0.9548       | 0.614       | 1.593         | -0.2763                  | 0.1491                    | 2         | n=4      |
| <b>Hip</b>     | -0.5575    | 2.5595        | 0.863        | 0.8633    | 0.5145       | 0.342       | 0.9153        | 0.4758                   | 0.7379                    | 1         | n=3      |
| <b>Hy</b>      | 6.7375     | 1.1641        | 0.00486      | 0.3635    | 0.2218       | 0.1766      | 0.3599        | 0.2521                   | 0.4017                    | 4         | n=6      |
| <b>Put</b>     | 10.7044    | 2.5229        | 0.0132       | -0.5896   | 0.5564       | 0.3491      | 1.939         | 0.02395                  | 0.2192                    | 4         | n=6      |
| <b>StT</b>     | 6.3672     | 1.313         | 0.00834      | 0.6007    | 0.3156       | 0.12675     | 1.033         | 0.344                    | 0.4752                    | 4         | n=6      |
| <b>Thal</b>    | 1.2076     | 7.885         | 0.888        | 0.9752    | 1.7475       | 0.616       | 1.667         | -0.2079                  | 0.094                     | 3         | n=5      |

Results from linear regression analysis. DA was set as y-variable and L-DOPA was set as x-variable. DF, degrees of freedom; Int, intercept; Res, residuals; SE, Standard error; SI, Slope.

**c) Summarised results from hypothesis tests of metabolite ratios between non-LID and LID.**

| <b>Ratios Cd</b> | <b>Mean Rank non-LID</b> | <b>Sum of Ranks non-LID</b> | <b>Mean Rank LID</b> | <b>Sum of Ranks LID</b> | <b>U-statistics</b> | <b>p-value</b> |
|------------------|--------------------------|-----------------------------|----------------------|-------------------------|---------------------|----------------|
| <b>DOPAC/DA</b>  | 8.333                    | 50                          | 4.667                | 28                      | 7                   | 0.09           |
| <b>3-MT/DA</b>   | 9                        | 54                          | 4                    | 24                      | 3                   | 0.0152         |

| <b>Ratios Put</b> | <b>Mean Rank non-LID</b> | <b>Sum of Ranks non-LID</b> | <b>Mean Rank LID</b> | <b>Sum of Ranks LID</b> | <b>U-statistics</b> | <b>p-value</b> |
|-------------------|--------------------------|-----------------------------|----------------------|-------------------------|---------------------|----------------|
| <b>DOPAC/DA</b>   | 8.333                    | 50                          | 4.667                | 28                      | 7                   | 0.09           |
| <b>3-MT/DA</b>    | 9                        | 54                          | 4                    | 24                      | 3                   | 0.02           |

Summary of results from Mann-Whitney U test, ratios of DOPAC/DA and 3-MT/DA in Cd and Put.



**Table S5. Two-way ANOVA test of dopamine in cortical layers.**

| <b>Cortical area: Precentral gyrus</b>         |                      |    |                   |          |
|------------------------------------------------|----------------------|----|-------------------|----------|
| <b>ANOVA table</b>                             | % of total variation | DF | F (DFn, DFd)      | P value  |
| <i>Cortical layer</i>                          | 8.77                 | 2  | F (2, 20) = 29.21 | P=0.0001 |
| <i>Dyskinesia</i>                              | 45.94                | 1  | F (1, 10) = 11.56 | P=0.0068 |
| <i>Interaction: Cortical layer x Dysinesia</i> | 2.55                 | 2  | F (2, 20) = 8.485 | P=0.0021 |

|               | Mean non-LID | Mean LID |
|---------------|--------------|----------|
| <i>Outer</i>  | 6.295        | 7.608    |
| <i>Middle</i> | 5.575        | 7.466    |
| <i>Deep</i>   | 4.763        | 7.151    |

| <b>Sidak's multiple comparisons test - non-LID vs LID in cortical layers</b> |            |                    |                  |    |
|------------------------------------------------------------------------------|------------|--------------------|------------------|----|
| <i>non-LID - LID</i>                                                         | Mean Diff. | 95.00% CI of diff. | Adjusted P Value | DF |
| <i>Outer</i>                                                                 | -1.313     | -2.751 to 0.1241   | 0.0815           | 30 |
| <i>Middle</i>                                                                | -1.891     | -3.329 to -0.4537  | 0.007            | 30 |
| <i>Deep</i>                                                                  | -2.388     | -3.826 to -0.9503  | <0.001           | 30 |

| <b>Cortical area: Insula</b>                    |                      |    |                   |         |
|-------------------------------------------------|----------------------|----|-------------------|---------|
| <b>ANOVA table</b>                              | % of total variation | DF | F (DFn, DFd)      | P value |
| <i>Cortical layer</i>                           | 4.82                 | 2  | F (2, 20) = 36.8  | P<0.001 |
| <i>Dyskinesia</i>                               | 35.12                | 1  | F (1, 10) = 6.05  | P=0.034 |
| <i>Interaction: Cortical layer x Dyskinesia</i> | 0.72                 | 2  | F (2, 20) = 5.501 | P=0.013 |

|               | Mean non-LID | Mean LID |
|---------------|--------------|----------|
| <i>Outer</i>  | 5.442        | 7.076    |
| <i>Middle</i> | 4.201        | 6.465    |
| <i>Deep</i>   | 4.603        | 6.85     |

| <b>Sidak's multiple comparisons test - non-LID vs LID in cortical layers</b> |            |                    |                  |    |
|------------------------------------------------------------------------------|------------|--------------------|------------------|----|
| <i>non-LID - LID</i>                                                         | Mean Diff. | 95.00% CI of diff. | Adjusted P Value | DF |
| <i>Outer</i>                                                                 | -1.633     | -3.762 to 0.4952   | 0.174            | 30 |
| <i>Middle</i>                                                                | -2.264     | -4.392 to -0.1352  | 0.034            | 30 |
| <i>Deep</i>                                                                  | -2.248     | -4.376 to -0.119   | 0.036            | 30 |

| <b>Cortical area: Temporal gyrus</b>            |                      |    |                   |          |
|-------------------------------------------------|----------------------|----|-------------------|----------|
| <b>ANOVA table</b>                              | % of total variation | DF | F (DFn, DFd)      | P value  |
| <i>Cortical layer</i>                           | 11.29                | 2  | F (2, 20) = 14.55 | P=0.0001 |
| <i>Dyskinesia</i>                               | 54.94                | 1  | F (1, 10) = 21.16 | P=0.001  |
| <i>Interaction: Cortical layer x Dyskinesia</i> | 0.053                | 2  | F (2, 20) = 0.068 | P=0.934  |

|               | Mean non-LID | Mean LID |
|---------------|--------------|----------|
| <i>Outer</i>  | 5.935        | 8.041    |
| <i>Middle</i> | 4.69         | 6.911    |
| <i>Deep</i>   | 5.018        | 7.286    |

| <b>Sidak's multiple comparisons test - non-LID vs LID in cortical layers</b> |            |                    |                  |    |
|------------------------------------------------------------------------------|------------|--------------------|------------------|----|
| <i>non-LID - LID</i>                                                         | Mean Diff. | 95.00% CI of diff. | Adjusted P Value | DF |
| <i>Outer</i>                                                                 | -2.106     | -3.483 to -0.7287  | 0.0017           | 30 |
| <i>Middle</i>                                                                | -2.221     | -3.598 to -0.8442  | <0.001           | 30 |
| <i>Deep</i>                                                                  | -2.268     | -3.645 to -0.8911  | <0.001           | 30 |

Results from investigation of differential distribution of DA in outer, middle and deep cortical layers in non-LID and LID performed using two-way ANOVA with Sidak's multiple comparisons test. CI, confidence interval; DF, degrees of freedom.
